# Supplementary material for: 2-DE-based proteomic analysis of protein changes associated with etiolated mesocotyl growth in Zea mays
Source: BMC Genomics. 2019 Oct 22;20:758. doi: 10.1186/s12864-019-6109-z (PMC6805590; doi:10.1186/s12864-019-6109-z)
Supplement: Supplementary file 1 — Additional file 1: Table S1. Consensus analysis and relative abundance changes in mesocotyl proteins resolved in 2-DE. The relative abundances (volumes) of the spots were determined using PDQuest8.0 software. [file 12864_2019_6109_MOESM1_ESM.xlsx]

## Sheet: Sheet1
Consensus Summary
Spot matched across gels	1 Gel	2 Gels	3 Gels	Amibiguous
48 h	6	18	365	6
84 h	15	90	371	10
132 h	5	68	306	20

## Sheet: 48h
Bio-Rad Laboratories
sorted by:SSP	Quantitation Table
SSP	48h-1	48h-2	48h-3
3	10163.4	14137.8	9133.6		1.12971	1.69445	1.03622	0.356119		3.29368		>2%	1	0.0025974
5	30104.4	24026.6	16970.7		3.34626	2.87964	1.92536	0.724264		1.6776		1-2%	3	0.00779221
7	10827.1	6091	9371		1.20349	0.73002	1.06316	0.243188		1.5408		<1%	381	0.98961
8	2198.5	2979.5	3630.3		0.244374	0.3571	0.411864	0.0854		1.31686
10	4093.1	4817.7	3753.4		0.454969	0.577412	0.42583	0.0804351		0.997992
12	10263.6	6906.9	6696		1.14085	0.827808	0.759673	0.203279		0.74135
15	26737.6	6513.7			2.97202	0.780682	0	1.5408		0.73598
16	9854.5	3437.2			1.09538	0.411956	0	0.553267		0.724264
17		24.9			0	0.00298432	0	0.001723		0.697771
18	69.4		475.5		0.00771416	0	0.0539463	0.0291751		0.665379
19	132.2	13.7	375.8		0.0146947	0.00164198	0.0426352	0.0209423		0.553267
20	35.8	496.2	767		0.00397935	0.0594707	0.0870175	0.0422955		0.541222
101	1068	916.5	1192.2		0.118714	0.109845	0.135257	0.012898		0.521668
102	1282	1344.4	1122.8		0.142501	0.161129	0.127384	0.0169033		0.501416
103	325	421.4	609.2		0.0361254	0.0505058	0.0691148	0.0165398		0.484613
104	415.2	225	165.2		0.0461516	0.0269668	0.0187422	0.0140652		0.419365
105	103	190.7	191.4		0.011449	0.0228558	0.0217147	0.0062823		0.377555
107	161.5	219.6	264.2		0.0179515	0.0263196	0.029974	0.00616329		0.356119
108	4256.6	3763.6	3290.2		0.473143	0.451076	0.373279	0.0524596		0.342659
110	2026.5	1712.3	163.3		0.225256	0.205223	0.0185267	0.114013		0.34161
201	2410.6	3266.2	2740.4		0.26795	0.391462	0.310903	0.0627025		0.332728
202	1052.5	1394.4	1143.3		0.116991	0.167122	0.129709	0.0260596		0.331603
203	821.7	1302.5	1379.9		0.0913361	0.156108	0.156552	0.0375248		0.29262
204	2778.2	3032.5	2867		0.308811	0.363452	0.325266	0.0280315		0.28836
205	3762.3	3227.3	1105.2		0.418199	0.386799	0.125387	0.160759		0.276531
207	901.1	1644.9	1106.1		0.100162	0.197145	0.125489	0.0503021		0.272345
208	4184.5	2788.6	1317		0.465128	0.33422	0.149416	0.158621		0.262662
209	1752	1996.3	1718.7		0.194744	0.239261	0.19499	0.0256315		0.249357
211	3123.9	3386	1798.9		0.347237	0.40582	0.204088	0.103778		0.24529
212	87.4	383.7	1.8		0.00971495	0.0459873	0.000204213	0.02416		0.243188
301	841.7	789.9	331.4		0.0935592	0.0946713	0.0375979	0.032635		0.219424
302	2427.9	2386.1	1523.1		0.269873	0.28598	0.172798	0.0612276		0.214791
303	4363.2	2687.5	1694.2		0.484992	0.322103	0.19221	0.1467		0.211015
305	6364.9	5363.3	2767.5		0.707491	0.642804	0.313978	0.211015		0.203279
306	666.8	437.5	519.5		0.0741182	0.0524354	0.0589382	0.011127		0.202738
307	282.2	273.7	367.4		0.031368	0.0328036	0.0416822	0.0055868		0.19721
308	164.3	125.5	236.6		0.0182628	0.0150415	0.0268427	0.00610001		0.196449
309	274.3	194.9	395.5		0.0304898	0.0233592	0.0448702	0.0109572		0.185527
310	631.1	161.5	392.5		0.0701499	0.0193561	0.0445298	0.0253972		0.180509
311	715.3	233.6	591.9		0.0795092	0.0279975	0.0671521	0.0268925		0.175043
401	2654.5	2629.9	362.8		0.295061	0.3152	0.0411603	0.152735		0.168241
405	12.5	440	2.4		0.00138944	0.052735	0.000272284	0.0299721		0.166838
406	344.3	1668.1	2.4		0.0382707	0.199926	0.000272284	0.106017		0.166221
407	127.4	151.1	192.8		0.0141612	0.0181097	0.0218735	0.00385654		0.163198
502	373.4	315.5	462.7		0.0415053	0.0378134	0.0524941	0.00763663		0.160759
504	168.9	162.5	167.9		0.0187741	0.019476	0.0190486	0.000353725		0.159334
601	4396.7	4158.9	1804.6		0.488715	0.498454	0.204735	0.166838		0.158621
602	329.3	2430.3	390.8		0.0366034	0.291277	0.044337	0.144855		0.153477
603	518.5	510.7	580.8		0.0576339	0.0612086	0.0658928	0.00414185		0.152735
701	1900.3	1445.8	627.4		0.211228	0.173282	0.0711796	0.072432		0.1467
702		185	230.2		0	0.0221727	0.0261166	0.0140787		0.144855
703	165.5	206.3	194.2		0.0183962	0.0247255	0.0220323	0.00317637		0.144706
705	329	324.5	62.8		0.03657	0.0388921	0.00712477	0.0177086		0.144601
706	1407.9	1162.1	1057.3		0.156495	0.13928	0.119953	0.0182815		0.140761
708	175.8	79.9	195.1		0.0195411	0.0095762	0.0221344	0.0066299		0.137418
801	112.1	77.7	95.8		0.0124605	0.00931252	0.0108687	0.00157401		0.137367
805	959.4	937	555.7		0.106642	0.112302	0.0630451	0.0269534		0.132167
904	274.2	353.2	302.6		0.0304787	0.0423318	0.0343305	0.00604641		0.129703
905	154.5		278.7		0.0171735	0	0.031619	0.0158291		0.124391
1002	279.2	461.2	1767		0.0310345	0.0552759	0.200469	0.0916305		0.124244
1004	8001.9	9721.2	8381.8		0.889452	1.16511	0.95093	0.144706		0.12134
1010	2401.6	1237.3	3433.6		0.26695	0.148293	0.389548	0.120633		0.120633
1102	718	504.7	1073		0.0798093	0.0604895	0.121734	0.0313097		0.118543
1103	5336.1	5676.6	6533.4		0.593134	0.680354	0.741226	0.0744353		0.118271
1106	1191.9	1106.5	1498.2		0.132486	0.132617	0.169973	0.0216059		0.114013
1110	1778.9	1706	2004.6		0.197734	0.204468	0.227425	0.015567		0.112878
1201	631.9	652.7	419.7		0.0702389	0.0782276	0.0476157	0.0158783		0.107722
1202	702.6	649.4	740.2		0.0780975	0.0778321	0.083977	0.00347368		0.106017
1203	157.8	158.1	457.1		0.0175403	0.0189487	0.0518588	0.01942		0.103778
1206	1426	1207.8	1063.6		0.158507	0.144758	0.120667	0.0191539		0.102187
1207	647.8	321.6	729.2		0.0720062	0.0385445	0.082729	0.0230468		0.100972
1208	733.6	1040.9	1149.4		0.0815433	0.124754	0.130401	0.0267276		0.099215
1301	1159	831	785.1		0.128829	0.0995973	0.089071	0.0205992		0.0955122
1302	266.3	234.3	330.4		0.0296006	0.0280814	0.0374845	0.00504779		0.0948881
1304	858	653.2	1037.8		0.095371	0.0782875	0.11774	0.0197853		0.0930002
1305	347.6	239.3	276.8		0.0386375	0.0286807	0.0314035	0.00514593		0.0916305
1307	638.9	866.7	782.9		0.071017	0.103876	0.0888214	0.0164487		0.0910863
1310	1196.8	1081.8	1455.5		0.13303	0.129656	0.165129	0.019579		0.0878312
1312	107.7	71.6	194.2		0.0119714	0.00858143	0.0220323	0.00699573		0.0854
1502	213.1	441.2	247.8		0.0236871	0.0528788	0.0281133	0.0157325		0.0849491
1503	195.4	167	267		0.0217197	0.0200153	0.0302916	0.00550734		0.0825392
1504	275.7	395.1	283.7		0.0306454	0.0473536	0.0321863	0.00923388		0.0817331
1602	141.1	190.3	161.5		0.015684	0.0228079	0.0183225	0.00360164		0.0812732
1608	3471.7	3001.5	2251.8		0.385897	0.359737	0.255471	0.0690009		0.0812534
1609	116.8	189.7	201.8		0.0129829	0.022736	0.0228946	0.00567727		0.0808126
1704	803.8	850.9	671.6		0.0893464	0.101982	0.0761942	0.0128949		0.0804351
1707	488.2	704.2	529		0.0542659	0.0844	0.060016	0.0159985		0.0785883
1708	125.6	315.5	47.2		0.0139611	0.0378134	0.00535492	0.0168154		0.0781775
1801	378.1	284.2	502.2		0.0420277	0.034062	0.0569755	0.0116327		0.0781516
1802	1376.5	1382	565.5		0.153005	0.165636	0.064157	0.0553044		0.0780232
1804	144.3	150.6	129.8		0.0160397	0.0180498	0.014726	0.00167398		0.0757505
1806	188.7	203.7	191.8		0.020975	0.0244139	0.02176	0.00180212		0.0750291
1808	108.8	114.7	69.5		0.0120937	0.0137471	0.0078849	0.00302248		0.0744353
1902	171.3	330.1	394.3		0.0190409	0.0395632	0.044734	0.0135895		0.0734552
2001	776.2	414.5	1279.8		0.0862785	0.0496788	0.145196	0.048191		0.072432
2103	814.9	353.5	663		0.0905802	0.0423678	0.0752185	0.0246292		0.0709131
2104	318.7	323.1	650.5		0.0354251	0.0387243	0.0738004	0.0212677		0.0694751
2105	1264.3	1478.2	995.4		0.140533	0.177166	0.11293	0.0322235		0.0690009
2106	152.5	408.3	506.2		0.0169511	0.0489357	0.0574293	0.0213449		0.0686911
2107	534.8	1390.6	1558.9		0.0594457	0.166667	0.17686	0.0650466		0.0666055
2201	1582.6	733.2	1590.9		0.175914	0.0878757	0.18049	0.0522002		0.0665823
2202	619.9	653.2	784.1		0.068905	0.0782875	0.0889575	0.0100331		0.0662853
2205	856.3	638.4	964.4		0.0951821	0.0765137	0.109413	0.0164994		0.0661768
2207	311.1	479.9	764.4		0.0345803	0.0575171	0.0867225	0.0261338		0.0650466
2208	131.2	111	146.5		0.0145835	0.0133036	0.0166207	0.00167288		0.0635659
2209	694.7	563.3	1048.4		0.0772194	0.0675128	0.118943	0.0273255		0.0634901
2301	776.4	414.2	1025.6		0.0863008	0.0496428	0.116356	0.0334111		0.063128
2302	1407.3	897.2	964.9		0.156428	0.107531	0.10947	0.0276882		0.0627025
2303	310.9	141.5	1267.1		0.0345581	0.0169591	0.143755	0.0686911		0.0624675
2306	281.4	291.2	719.1		0.031279	0.034901	0.0815832	0.028056		0.0612276
2307	418	120.6	331.6		0.0464628	0.0144542	0.0376206	0.0165299		0.0611627
2401	221.2	384.5	538.9		0.0245875	0.0460832	0.0611392	0.0183701		0.0591879
2402	114.4	122.6	398.4		0.0127161	0.0146939	0.0451992	0.01821		0.0588904
2404	208.5	539.6	430.3		0.0231758	0.0646723	0.0488183	0.0209398		0.0588406
2405	698	1020.5	652.8		0.0775862	0.122309	0.0740613	0.0268962		0.0583209
2501	1008.2	385.1	1273.2		0.112067	0.0461551	0.144447	0.05009		0.0571871
2502	99.5	126.7	111.6		0.0110599	0.0151853	0.0126612	0.00207981		0.0564845
2503	436.1	208.3	766.7		0.0484747	0.0249652	0.0869835	0.03131		0.0563417
2504	368.1	643.8	658.3		0.0409162	0.0771609	0.0746853	0.0202491		0.0560522
2507	407.3	668.4	289.4		0.0452734	0.0801093	0.0328329	0.0245063		0.0553044
2601	3055.4	2707.1	2219.5		0.339623	0.324452	0.251806	0.0469386		0.0547172
2603	106.9	399.5	442.7		0.0118825	0.047881	0.0502251	0.0214924		0.0541734
2701	110.8	107.8	288		0.012316	0.0129201	0.0326741	0.0115833		0.053906
2703	725	1158.6	1111.9		0.0805874	0.138861	0.126147	0.0306407		0.0535898
2705	706.2	1117.4	844.2		0.0784977	0.133923	0.095776	0.0283599		0.0531657
2707	752.7	1080.2	348.6		0.0836664	0.129464	0.0395493	0.0449602		0.0528776
2802	143.1	168.7	258.8		0.0159063	0.0202191	0.0293613	0.00687045		0.0527927
2807	586.4	1171.2	1495.7		0.0651813	0.140371	0.16969	0.053906		0.0525571
2905	146.7	268.5	180.9		0.0163064	0.0321803	0.0205234	0.0082224		0.0524596
2907	126.8	219.1	166.6		0.0140945	0.0262596	0.0189011	0.00612704		0.0522002
3001	732.4	1588.9	1663.8		0.08141	0.190433	0.188761	0.0624675		0.0517261
3005	30815	25506.9	24175.3		3.42524	3.05706	2.74273	0.34161		0.0511079
3009	19515.2	15748.9	19137.6		2.16921	1.88754	2.17119	0.163198		0.0503021
3101	4789.9	5140.4	5004.2		0.532422	0.616089	0.567735	0.0420027		0.0501434
3102	423.7	391.9	700.2		0.0470964	0.0469701	0.0794389	0.0187095		0.05009
3103			5079.7		0	0	0.576301	0.332728		0.0496708
3107	2202.5	1263.2	2785.1		0.244819	0.151397	0.315975	0.0825392		0.0489195
3110	68.2	34.2	737.1		0.00758077	0.00409895	0.0836253	0.0449432		0.048725
3201	1169.5	1504.6	995.3		0.129996	0.18033	0.112919	0.0350462		0.0487165
3202	809.9	702.3	1318.7		0.0900245	0.0841723	0.149609	0.0362089		0.0482779
3301	299.9	1444.3	726		0.0333354	0.173103	0.082366	0.0709131		0.048191
3303	359.6	430.1	384.1		0.0399714	0.0515485	0.0435768	0.0059242		0.0481294
3304	387.9	487.4	499.6		0.043117	0.058416	0.0566805	0.00837694		0.0480843
3305	4170.5	6553.1	3332.4		0.463572	0.785404	0.378067	0.214791		0.0473551
3401	743.2	949	1100.5		0.0826104	0.11374	0.124854	0.0218977		0.0469386
3403	118.9	242.9	435.5		0.0132163	0.0291121	0.0494082	0.0181405		0.0462194
3404	230.3	347.6	338.4		0.025599	0.0416607	0.0383921	0.00848846		0.046006
3405	305.9	491	355.6		0.0340023	0.0588475	0.0403435	0.0129092		0.0459256
3406	110	34.9	733.2		0.0122271	0.00418285	0.0831828	0.043475		0.0451773
3407	328.4	510.4	388.3		0.0365033	0.0611726	0.0440533	0.0126402		0.0449602
3410	1073.9	311.6	1217.3		0.119369	0.037346	0.138105	0.0535898		0.0449432
3501	401.1	792.1	358.3		0.0445843	0.094935	0.0406498	0.0302698		0.0448476
3502	1271.1	1676.6	1341.1		0.141289	0.200944	0.15215	0.0317742		0.0447543
3504	250.9	963.3	1084.4		0.0278888	0.115454	0.123027	0.0528776		0.0447539
3506	1567.2	1622.8	765.7		0.174202	0.194496	0.08687	0.0571871		0.0446222
3507	446.5	599.4	697.5		0.0496307	0.0718395	0.0791326	0.0153665		0.043475
3509	604	883.8	695.8		0.0671376	0.105925	0.0789397	0.0198831		0.0431346
3602	2101.4	3660.6	1568.1		0.233581	0.438731	0.177904	0.137367		0.0423914
3604	2181.7	2646	1624.5		0.242507	0.317129	0.184302	0.0665823		0.0422955
3605	13323.8	27148.6	13866.5		1.48101	3.25382	1.57318	0.997992		0.0420027
3606	1763	1671.6	1757		0.195966	0.200345	0.199335	0.00229277		0.0406939
3701	283.4	558.2	91.9		0.0315013	0.0669016	0.0104262	0.0285389		0.0398021
3702	94.5	299.6	288.8		0.0105042	0.0359078	0.0327649	0.0138489		0.0387732
3703	360.1	820	836.3		0.0400269	0.0982789	0.0948797	0.0326947		0.0384714
3707	97.3		127.7		0.0108154	0	0.0144878	0.00753166		0.0376882
3708	736.4	419.5	275.9		0.0818546	0.050278	0.0313013	0.025537		0.0375248
3710	171.8	681.3	405		0.0190964	0.0816554	0.045948	0.0313838		0.0369952
3711	2247.1	10439.8	6214.5		0.249776	1.25123	0.705046	0.501416		0.0362089
3802	833	1022.5	903.1		0.0925922	0.122549	0.102458	0.0152665		0.0354235
3803	665.8	755.8	468.2		0.074007	0.0905844	0.0531181	0.0187744		0.0350462
3804	166.1	491.4	609.4		0.0184629	0.0588954	0.0691375	0.0267943		0.0345607
3805	1159.6	1480.9	1575.7		0.128895	0.177489	0.178766	0.0284314		0.034306
3811	1048.7	655.6	1544.9		0.116568	0.0785752	0.175272	0.0487165		0.0337168
3812	319.3		497.8		0.0354918	0	0.0564763	0.028547		0.0334111
3814	1172	1776.5	1250.1		0.130274	0.212918	0.141826	0.0447539		0.0326947
3816			103.9		0	0	0.0117876	0.0068056		0.032635
3817	3153.2	2733.4	4224		0.350494	0.327604	0.47922	0.0817331		0.0324297
4001	516.3		729.3		0.0573893	0	0.0827404	0.0423914		0.0322235
4002	184.1	218.5	519.3		0.0204636	0.0261877	0.0589155	0.0207462		0.0317742
4101	519.8	312.5	1953.4		0.0577784	0.0374538	0.221617	0.100972		0.0313838
4102	829.7	233.9	1282.9		0.0922253	0.0280335	0.145547	0.0588406		0.03131
4104	280.2	232.2	430.9		0.0311456	0.0278297	0.0488864	0.0113219		0.0313097
4107	2244.1	5667.8	2162.9		0.249443	0.679299	0.245385	0.249357		0.0307239
4202	178.4	204.1	314.7		0.0198301	0.0244619	0.0357033	0.00816274		0.0306407
4203	1581.8	2107.4	2346.4		0.175825	0.252577	0.266203	0.048725		0.0306111
4204	1368.7	687.4	1421.1		0.152138	0.0823865	0.161226	0.0431346		0.0303452
4205	590.6	801.2	1543.1		0.0656482	0.0960257	0.175067	0.0564845		0.0302698
4207	2393.5	1379.7	2717.9		0.26605	0.16536	0.308351	0.0734552		0.030268
4208	776.1	512.5	532.2		0.0862674	0.0614243	0.060379	0.0146542		0.0299721
4301	376.3	82.7	603.5		0.0418276	0.00991179	0.0684681	0.0293178		0.0294075
4401	680.1	146	1118.2		0.0755965	0.0174984	0.126862	0.0547172		0.0293178
4403	265.7	37.7	235.8		0.0295339	0.00451843	0.0267519	0.0137103		0.0291768
4404	480.2	430.5	467.4		0.0533767	0.0515964	0.0530274	0.000943293		0.0291751
4407	2489.2	4887.9	7517.7		0.276687	0.585826	0.852896	0.28836		0.0291749
4408	1292.7	1675.3	911.7		0.14369	0.200789	0.103434	0.0489195		0.0289223
4504	88.8	144.5	142.3		0.00987057	0.0173187	0.0161442	0.00400441		0.028547
4505	950.3	666.3	2223.6		0.105631	0.0798576	0.252271	0.0930002		0.0285389
4506	75.8	85.8	24.1		0.00842555	0.0102833	0.00273419	0.00393346		0.0284314
4603	7219.2	5891.2	6693.2		0.80245	0.706074	0.759355	0.0482779		0.0283599
4606	231	298.4	232.6		0.0256768	0.0357639	0.0263889	0.00562951		0.0283038
4607	596.7	951	561.4		0.0663262	0.11398	0.0636918	0.0283038		0.028056
4608	83.8	148.9	145.2		0.00931479	0.017846	0.0164732	0.00458092		0.0280315
4609	163.9	309.4	450.6		0.0182183	0.0370823	0.0511214	0.0165104		0.0276882
4610	3992.8	4642.9	4385.2		0.44382	0.556462	0.497509	0.0563417		0.0273255
4614	274.9	239.3	339		0.0305565	0.0286807	0.0384602	0.00519013		0.0271132
4703	287.3	674.9	655.4		0.0319348	0.0808883	0.0743563	0.0265791		0.0269534
4705	487.9	427.8	542.2		0.0542325	0.0512728	0.0615136	0.00527013		0.0268962
4706	370.6	384.2	386.8		0.0411941	0.0460473	0.0438831	0.00243133		0.0268925
4707	219.4	224	336.5		0.0243874	0.0268469	0.0381765	0.00735469		0.0267943
4708	182.9	203.9	280		0.0203303	0.0244379	0.0317665	0.00579322		0.0267626
4710	192.9	346.8	505.3		0.0214418	0.0415648	0.0573272	0.0179868		0.0267276
4711	636.4	814.4	862		0.0707391	0.0976077	0.0977954	0.0155671		0.0265791
4713	193	333.7	321		0.0214529	0.0399947	0.036418	0.00983654		0.0264328
4716	502.3	534.2	802.3		0.0558332	0.0640251	0.0910224	0.018413		0.0263424
4805	116.1	251.7	434		0.0129051	0.0301668	0.0492381	0.018174		0.026305
5001	2425.5	1837.8	2509.8		0.269607	0.220265	0.284741	0.0337168		0.0261338
5002	3525.6	3417	4717.5		0.391888	0.409535	0.535209	0.0781516		0.0260779
5003	3975.8	5917.8	5560.4		0.44193	0.709262	0.630837	0.137418		0.0260596
5005	1520.5	630.8	2084.9		0.169011	0.0756028	0.236536	0.0808126		0.0256315
5008	4033.9	1327.9	3990		0.448388	0.159152	0.452673	0.168241		0.025537
5009	33453.8	25263.6	21049.7		3.71856	3.0279	2.38813	0.665379		0.0253972
5011	120.3	25.1	435.1		0.013372	0.00300829	0.0493629	0.0243293		0.025294
5101	6061.3	10624.6	14393.9		0.673744	1.27338	1.63301	0.484613		0.0252885
5104	5416.8	3110.5	4739.8		0.602105	0.372801	0.537739	0.118271		0.0250218
5105	2909.1	2589.5	4086		0.323361	0.310358	0.463564	0.0849491		0.0247458
5106	671.1	260.9	1610.9		0.0745961	0.0312695	0.182759	0.0780232		0.0246292
5107	285.4	1656.2	1705.9		0.0317236	0.198499	0.193537	0.0948881		0.0245063
5108	889.2	880.9	768		0.0988391	0.105578	0.087131	0.00933436		0.0243293
5110	8965.4	4231.4	6885.8		0.996549	0.507143	0.781206	0.24529		0.0243134
5203	4891.7	2294.3	5811.8		0.543737	0.274977	0.659359	0.19721		0.02416
5204	17687	4340.1	8448.6		1.966	0.520171	0.958509	0.74135		0.0230718
5205	23056.5	553.6	17991.9		2.56285	0.0663502	2.04121	1.31686		0.0230468
5206	11305.8	5801.7	15316.2		1.2567	0.695347	1.73765	0.521668		0.0227127
5302	711	779.4	1087.6		0.0790312	0.0934129	0.12339	0.0226318		0.0226318
5401	240.6	326.1	413.7		0.0267439	0.0390838	0.046935	0.0101784		0.0225436
5402	343.6	193.9	364.6		0.0381929	0.0232394	0.0413645	0.00967977		0.0223354
5403	2059	1202.8	1429.6		0.228868	0.144158	0.162191	0.0446222		0.0223299
5404	422.7	90	336.8		0.0469852	0.0107867	0.0382106	0.018883		0.0218977
5405	4285.3	904.7	2945.5		0.476333	0.10843	0.334172	0.185527		0.0216059
5406	2837.2	4502.3	4476.3		0.315369	0.539611	0.507844	0.12134		0.0214924
5407	91	694.3	551.7		0.0101151	0.0832135	0.0625913	0.0376882		0.0213449
5409	872.6	1222.1	1064		0.0969939	0.146472	0.120713	0.0247458		0.0212677
5501	4717	3327.2	4779.6		0.524318	0.398773	0.542254	0.0781775		0.0209423
5502	338.3	36.9	546.9		0.0376038	0.00442255	0.0620468	0.0289223		0.0209398
5513	488.7	420.8	712.3		0.0543215	0.0504339	0.0808117	0.0165311		0.0209367
5514	789.4	615.9	340.8		0.0877458	0.073817	0.0386644	0.025294		0.0208206
5515	55378.9	23494.3	41990.6		6.15564	2.81585	4.76391	1.6776		0.0207462
5520	12024.7	13387.6	63204.5		1.33661	1.60453	7.17066	3.29368		0.0206334
5601	1017.2	675.6	790.3		0.113067	0.0809722	0.0896609	0.0166002		0.0205992
5602	10761.1	9793.3	6290.2		1.19615	1.17375	0.713634	0.272345		0.0202491
5704	591.8	472.4	686.3		0.0657816	0.0566182	0.077862	0.0106552		0.0200385
5706	366.5	284.8	822.5		0.0407383	0.0341339	0.0933141	0.0324297		0.0198831
5708	1097.2	369.8	1075.7		0.121959	0.0443214	0.12204	0.0448476		0.0197853
5711	730.8	1178.8	1039.1		0.0812321	0.141282	0.117888	0.030268		0.019579
5801	418.4	606.9	947.8		0.0465073	0.0727384	0.10753	0.0306111		0.0194273
5802	548.9	502.8	983.4		0.061013	0.0602617	0.111568	0.0294075		0.01942
6003	2031	1123.6	441.9		0.225756	0.134666	0.0501343	0.0878312		0.0193616
6102	1662.9	2433.2	1295.1		0.18484	0.291625	0.146931	0.0750291		0.0191774
6103	1014.3	2765.1	3311		0.112745	0.331404	0.375639	0.140761		0.0191539
6104	992.8	1372.3	658.9		0.110355	0.164473	0.0747534	0.0451773		0.018883
6107	19742.2	22830.6	18527.7		2.19445	2.7363	2.102	0.342659		0.0187744
6108	764.9	7.4	670.9		0.0850225	0.000886907	0.0761148	0.0462194		0.0187095
6201	115.5	179.4	236		0.0128384	0.0215015	0.0267746	0.00703649		0.018413
6203	1204	555.6	1531.8		0.133831	0.0665899	0.173785	0.0541734		0.0183701
6204	1073.5	1063.3	1399.3		0.119325	0.127439	0.158753	0.0208206		0.0182815
6206	10179.8	12593.9	8227.7		1.13154	1.50941	0.933447	0.29262		0.01821
6304	6286	4653.7	6154.7		0.698721	0.557757	0.698262	0.0812534		0.0181799
6306	1066.1	422.3	468.9		0.118502	0.0506136	0.0531975	0.0384714		0.018174
6307	2825.6	1970.6	1744.7		0.31408	0.236181	0.197939	0.0591879		0.0181405
6308	542.1	421.6	1454.7		0.0602571	0.0505297	0.165038	0.0634901		0.0179868
6402	376.2	403.6	688.8		0.0418165	0.0483724	0.0781456	0.0193616		0.0177086
6404	46.4	34.4	381.8		0.00515759	0.00412292	0.0433159	0.0223354		0.0177042
6405	24800	18465.3	11460.5		2.75665	2.21311	1.30021	0.73598		0.0172704
6407	93.5	309.4	419.5		0.010393	0.0370823	0.047593	0.0191774		0.0169033
6408	255.1	200.2	273.2		0.0283557	0.0239944	0.030995	0.00353541		0.0168894
6409	81.4	218.1	1158.6		0.00904802	0.0261398	0.131445	0.0662853		0.0168154
6412	320.5	300.2	635.2		0.0356252	0.0359797	0.0720646	0.0209367		0.0167394
6413	1066.5	1176.2			0.118547	0.14097	0	0.0757505		0.0166002
6501	91.9	212.8	169.3		0.0102151	0.0255046	0.0192074	0.0076842		0.0165398
6506	3234.4	2097.2	3618.4		0.35952	0.251354	0.410514	0.0812732		0.0165311
6507	563	65.9	155.1		0.0625803	0.00789827	0.0175964	0.0291768		0.0165299
6509	362	131.5	367		0.0402381	0.0157606	0.0416368	0.0145527		0.0165104
6512	3882.4	3482.6	1847.7		0.431548	0.417398	0.209625	0.124244		0.0164994
6601	200	70.9	371		0.022231	0.00849753	0.0420906	0.0168894		0.0164487
6604	204.8	173.2	186		0.0227646	0.0207584	0.021102	0.00107289		0.0163602
6605			1390.6		0	0	0.157766	0.0910863		0.0159985
6606	471.4		272.8		0.0523985	0	0.0309496	0.0263424		0.0158783
6608	1608.1	2152.8			0.178748	0.258018	0	0.132167		0.0158313
6609	916.8	1289.8			0.101907	0.154586	0	0.0785883		0.0158291
6702	1680.5	1538.4	2044		0.186796	0.184381	0.231895	0.0267626		0.0157325
6705	1462.9	1448.7	803.8		0.162609	0.17363	0.0911925	0.0447543		0.0155671
6803	237.9	221.4	379.2		0.0264438	0.0265353	0.0430209	0.0095445		0.015567
6805	104.3	168.9	162.8		0.0115935	0.0202431	0.0184699	0.00456883		0.0153665
7001	11880.3	7636.1	8569.7		1.32056	0.915204	0.972248	0.219424		0.0152822
7002	1891.2	1952.2	2390.2		0.210216	0.233976	0.271172	0.0307239		0.0152665
7101	1662.9	1230.5	2433.8		0.18484	0.147478	0.276119	0.0661768		0.0146542
7102	688	406.3	1380.7		0.0764747	0.048696	0.156643	0.0560522		0.0145527
7103		1154.6	514		0	0.138381	0.0583142	0.0694751		0.0141367
7104	779.2	1084.2	1574		0.086612	0.129944	0.178573	0.046006		0.0140787
7105	158.2	463.9	261.2		0.0175847	0.0555995	0.0296336	0.0194273		0.0140652
7106	3321.9	2678.3	2151.4		0.369246	0.321	0.24408	0.063128		0.0138489
7201	4542.8	3925.3	3736.1		0.504955	0.470456	0.423867	0.0406939		0.0137103
7202	356.4	505.4	534.2		0.0396157	0.0605734	0.0606059	0.0121094		0.0136581
7203	479.6	804.1	425.6		0.05331	0.0963732	0.0482851	0.0264328		0.0135895
7205	16541	18491.2	16742.4		1.83862	2.21621	1.89945	0.202738		0.0135778
7206	398.7	270.4	99.3		0.0443175	0.0324081	0.0112658	0.0167394		0.0132229
7207	648.8	1172.3	344.5		0.0721174	0.140503	0.0390841	0.0517261		0.0129092
7209	714.7	620.4	945.3		0.0794425	0.0743564	0.107246	0.0177042		0.012898
7210	1197.6	1397.2	1353.2		0.133119	0.167458	0.153523	0.0172704		0.0128949
7301	1848.7	762.8	2895.1		0.205492	0.0914233	0.328454	0.118543		0.0126431
7304	77.7	179.2	122.1		0.00863675	0.0214775	0.0138525	0.00645796		0.0126402
7305	898.9	407.8	2828.7		0.0999173	0.0488758	0.320921	0.144601		0.0123425
7307	116.5	39.4	260.4		0.0129496	0.00472218	0.0295428	0.0126431		0.0121094
7401	1409	870.8	712.8		0.156617	0.104367	0.0808684	0.0387732		0.0121007
7403	4278.1	3627.1	2529.3		0.475532	0.434716	0.286954	0.099215		0.0119633
7408	984.9	970.5	794.5		0.109477	0.116317	0.0901374	0.0135778		0.0116327
7410	124.7	488.2	255.2		0.013861	0.0585119	0.0289529	0.0227127		0.0115833
7414	1764	2518.7	2276		0.196077	0.301872	0.258216	0.0531657		0.0113219
7416	1144.2	1313.6	1349.5		0.127184	0.157438	0.153103	0.0163602		0.011127
7502	549.9	575	347.5		0.0611242	0.0689151	0.0394245	0.0152822		0.0109572
7507	623.5	810.5	695.7		0.0693052	0.0971403	0.0789284	0.0141367		0.010693
7602	177	344.9	491.8		0.0196744	0.0413371	0.0557956	0.0181799		0.0106552
7603	2235.7	1936.8	1592.1		0.248509	0.23213	0.180627	0.0354235		0.0101784
7607	114	286.8	289.1		0.0126717	0.0343736	0.0327989	0.0121007		0.0100347
7609	3668.1	4234.8	2206.1		0.407728	0.507551	0.250286	0.129703		0.0100331
7611		121.4	2404.6		0	0.0145501	0.272806	0.153477		0.00983654
7613		161.1	43.3		0	0.0193082	0.00491246	0.0100347		0.00967977
7615	114.7	330.3	358.9		0.0127495	0.0395872	0.0407178	0.0158313		0.0095445
7616	132	666.9	578.7		0.0146725	0.0799295	0.0656545	0.034306		0.00933436
7617	1173.8	1550.4	1019.1		0.130474	0.185819	0.115619	0.0369952		0.00923388
7618	206.6	576.6	408.6		0.0229646	0.0691068	0.0463564	0.0230718		0.00901025
7704	387.4	532.1	511.5		0.0430615	0.0637734	0.0580306	0.010693		0.00878901
7705	91.8	305.2	191.4		0.010204	0.0365789	0.0217147	0.0132229		0.00848846
7706	353.8	805.5	176.3		0.0393267	0.096541	0.0200015	0.0398021		0.00844083
8009	10771.7	11214.4	8774.1		1.19733	1.34407	0.995437	0.175043		0.00837694
8010	27143.4	31234.9	23669.9		3.01713	3.74358	2.68539	0.541222		0.0082224
8101	672.5	1024.5	763.5		0.0747518	0.122789	0.0866204	0.0250218		0.00816274
8102	307.2	638.2	670.1		0.0341468	0.0764897	0.076024	0.0243134		0.0076842
8103	2047.5	2402.7	2319		0.22759	0.287969	0.263095	0.0303452		0.00763663
8104	269.1	230.5	441.2		0.0299118	0.027626	0.0500549	0.0123425		0.00753166
8108	670.8	1496.5	1056.7		0.0745628	0.179359	0.119884	0.0525571		0.00735469
8109	2089.9	2130.8	2197.5		0.232303	0.255381	0.24931	0.0119633		0.00703649
8201	107.1	247.4	561.2		0.0119047	0.0296515	0.0636691	0.026305		0.00699573
8202	379	246.4	285.1		0.0421278	0.0295316	0.0323451	0.0066116		0.00687045
8203	1008.1	521.1	646		0.112055	0.062455	0.0732898	0.0260779		0.0068056
8207	1235.4	1081.9	1061.8		0.137321	0.129668	0.120463	0.00844083		0.0066299
8303	0.6	826	632.8		6.6693e-05	0.098998	0.0717923	0.0511079		0.0066116
8308	242.1	530.3	599.2		0.0269106	0.0635577	0.0679803	0.0225436		0.00645796
8401	18071.8	17579.5	13983.9		2.00877	2.10694	1.5865	0.276531		0.0062823
8402	6436.9	7859.4	8090.7		0.715494	0.941967	0.917904	0.124391		0.00616329
8403	595.6	203.3	279.9		0.0662039	0.024366	0.0317552	0.0223299		0.00612704
8409	292.6	2062.2	1766.8		0.032524	0.247159	0.200447	0.112878		0.00610001
8412	174.2	1181.8	735.5		0.0193632	0.141641	0.0834438	0.0611627		0.00604641
8413		766	426.4		0	0.0918069	0.0483758	0.0459256		0.0059242
8415	3146.3	3867.5	3055.6		0.349727	0.463529	0.346663	0.0666055		0.00579322
8502	220.4	1250.8	927.7		0.0244986	0.149911	0.105249	0.0635659		0.00567727
8506	262.1	686.8	1089.4		0.0291337	0.0823146	0.123594	0.0473551		0.00562951
8508	114.8	1754.5	1383.6		0.0127606	0.210281	0.156972	0.102187		0.0055868
8509	229.6	850.6	1008.5		0.0255212	0.101946	0.114416	0.0481294		0.00550734
8510	503.4	1265.5	712.1		0.0559554	0.151673	0.080789	0.0496708		0.00527013
8512	2160.9	3031.2	302.4		0.240195	0.363296	0.0343078	0.166221		0.00519013
8513	657.7	714.1	990.1		0.0731067	0.0855865	0.112329	0.0200385		0.00514593
8601	208.5	963.8	1002.1		0.0231758	0.115514	0.11369	0.0527927		0.00504779
8602	187.2	1040.1	235.7		0.0208082	0.124658	0.0267406	0.0583209		0.00458092
8608	280.2	805.3	391.2		0.0311456	0.0965171	0.0443823	0.0345607		0.00456883
8804	0.9	201.6	512.7		0.00010004	0.0241622	0.0581667	0.0291749		0.00414185
9002	1248.5	1223.5	1134.1		0.138777	0.146639	0.128666	0.00901025		0.00400441
9003	39.6	94.9	192.7		0.00440174	0.011374	0.0218622	0.00878901		0.00393346
9006	31400.3	31813.6	27763.4		3.4903	3.81293	3.14981	0.331603		0.00385654
9008	110.1	3152.5	2817.6		0.0122382	0.377834	0.319662	0.196449		0.00360164
9101	1336.8	1656	1593.3		0.148592	0.198475	0.180763	0.0252885		0.00353541
9103	7267.2	2714.3	6580.1		0.807786	0.325315	0.746524	0.262662		0.00347368
9104	574.4	912.5	538.4		0.0638475	0.109365	0.0610824	0.0271132		0.00317637
9302	336.9	367.5	561.5		0.0374481	0.0440457	0.0637032	0.0136581		0.00302248
9305	318.1	3148.1	2702.5		0.0353584	0.377307	0.306603	0.180509		0.00243133
9401	7592.2	7416.6	6219.6		0.843911	0.888897	0.705625	0.0955122		0.00229277
9402	2249.5	13115.2	4613.5		0.250043	1.57189	0.52341	0.697771		0.00207981
9404	707.1	755.6	1473.9		0.0785977	0.0905604	0.167217	0.0480843		0.00180212
9406	6086.2	11825.7	10343.8		0.676512	1.41734	1.17352	0.377555		0.001723
9409	2691.2	258.7	7521.4		0.29914	0.0310058	0.853316	0.419365		0.00167398
9501	1578.4	1802.9	1670.6		0.175447	0.216082	0.189533	0.0206334		0.00167288
9502		946.6	258.5		0	0.113452	0.0293273	0.0588904		0.00157401
9601	231.6	1859.2	431.2		0.0257435	0.222829	0.0489204	0.107722		0.00107289
9701	76.1	685.8	918.4		0.0084589	0.0821947	0.104194	0.0501434		0.000943293
9802	521	1813.4	3319.3		0.0579118	0.21734	0.37658	0.159334		0.000353725
	899644	834360	881432

## Sheet: 84h
Bio-Rad Laboratories
sorted by:SSP
SSP	84h-1	84h-2	84h-3
3	1864.6	1942.3	496.5		0.00219399	0.0023403	0.000748339	0.000879928	0.0879928		2.36772	97.6323	>2%	2	0.00529101
7	3950.7	2849.7	2494.8		0.00464861	0.00343363	0.00376024	0.00062876	0.062876		2.13888		1-2%	3	0.00793651
8	7154.5	6962.8	4492		0.00841837	0.00838955	0.00677047	0.000943206	0.0943206		1.57372		<1%	373	0.986772
10	10125.8	10977.9	8781.9		0.0119146	0.0132274	0.0132363	0.000760555	0.0760555		1.23783
12	11981.5	7768.1	8068		0.0140981	0.00935987	0.0121603	0.00238216	0.238216		1.09188
15	872.9	268.9	1702.6		0.0010271	0.000324	0.00256621	0.00114679	0.114679		0.826546
16	2561	447.9	1881.4		0.00301341	0.00053968	0.0028357	0.00137977	0.137977		0.617507
17	848.6	50.5	740.1		0.000998509	6.0848e-05	0.0011155	0.000578098	0.0578098		0.551625
19	940.4		238.1		0.00110653	0	0.000358871	0.000564531	0.0564531		0.538427
20	1648.3	1089.6	1410.5		0.00193948	0.00131287	0.00212595	0.000425931	0.0425931		0.521382
21	5900	6636.2	5477.7		0.00694226	0.00799603	0.00825615	0.000695748	0.0695748		0.454858
101	1309.7	899.6	716		0.00154106	0.00108394	0.00107918	0.000265307	0.0265307		0.384354
102		1645.9	1100.6		0	0.00198316	0.00165886	0.00106379	0.106379		0.381381
103	474.4	320.2	296.8		0.000558205	0.000385812	0.000447346	8.73644e-05	0.00873644		0.333813
105	378.4		301		0.000445246	0	0.000453676	0.000259531	0.0259531		0.316569
107	404.9	122.4	351.5		0.000476427	0.000147481	0.000529791	0.000207048	0.0207048		0.312566
108	3920.3	3641.6	2990.3		0.00461284	0.0043878	0.00450707	0.000112585	0.0112585		0.310042
110	2710.5	3837.1	1454.8		0.00318932	0.00462336	0.00219272	0.00122187	0.122187		0.307775
201	1173.6	1200.6	994.9		0.00138092	0.00144662	0.00149954	5.94248e-05	0.00594248		0.30158
202	534	452.6	538.6		0.000628333	0.000545343	0.000811794	0.000136346	0.0136346		0.292043
203	250.7	348	532.3		0.000294987	0.000419309	0.000802298	0.000264418	0.0264418		0.283316
204	1312.8	747.5	1036.9		0.00154471	0.000900671	0.00156285	0.000377181	0.0377181		0.247041
205	3174.2	2046.5	1126		0.00373494	0.00246585	0.00169714	0.00102909	0.102909		0.245219
207	3868.1	5082.1	3462.4		0.00455142	0.00612348	0.00521863	0.000789018	0.0789018		0.238216
208	2893.9	2061.9	1493		0.00340512	0.00248441	0.00225029	0.000610485	0.0610485		0.237947
209	1871.4	2073.9	1270.6		0.00220199	0.00249886	0.00191509	0.000291904	0.0291904		0.232903
211	2608.5	2635.1	1932.3		0.0030693	0.00317506	0.00291242	0.000132147	0.0132147		0.231477
212	323.3	257.8			0.000380412	0.000310626	0	0.000202514	0.0202514		0.226396
213	1031.2	309.1	416.4		0.00121337	0.000372438	0.00062761	0.000431158	0.0431158		0.225751
301			151.2		0	0	0.000227893	0.000131574	0.0131574		0.225136
302	1886.3	2234.2	761.4		0.00221952	0.00269201	0.0011476	0.000791354	0.0791354		0.218324
303	3890.5	1753.3	1288.8		0.00457777	0.00211257	0.00194252	0.00147483	0.147483		0.200501
305	4835.2	3276.9	2295.6		0.00568936	0.00394837	0.00346	0.00117187	0.117187		0.19777
306	1466.4	779.1	811.3		0.00172545	0.000938746	0.00122282	0.000398378	0.0398378		0.196933
307	1054.5		573		0.00124078	0	0.000863642	0.000636089	0.0636089		0.192588
308	261.9		283.2		0.000308166	0	0.000426847	0.000220322	0.0220322		0.187224
309	448.4	1000.7	417.1		0.000527612	0.00120575	0.000628665	0.00036586	0.036586		0.18408
310	1565.3		612.4		0.00184182	0	0.000923027	0.000920909	0.0920909		0.182236
311	1493.5		777.3		0.00175733	0	0.00117157	0.000894792	0.0894792		0.178983
401	2233.4	1601.3	231		0.00262794	0.00192942	0.00034817	0.00116802	0.116802		0.177345
403	198.7		202.2		0.000233801	0	0.000304762	0.000159467	0.0159467		0.171935
404	433.1		263.1		0.000509609	0	0.000396552	0.000267624	0.0267624		0.168476
406	3069.3	5081.4			0.0036115	0.00612263	0	0.00307775	0.307775		0.163975
407	634.8	182.1	209.3		0.00074694	0.000219414	0.000315463	0.000280975	0.0280975		0.148721
502	705	203	594		0.000829541	0.000244597	0.000895294	0.000358211	0.0358211		0.147483
504	213.1		255.9		0.000250745	0	0.0003857	0.000195725	0.0195725		0.143605
601	3653.3	5120.8	2310.2		0.00429867	0.00617011	0.003482	0.00137811	0.137811		0.13993
602	7076.2	5036.3	588.9		0.00832624	0.00606829	0.000887607	0.00381381	0.381381		0.138364
603	433.6		362.6		0.000510197	0	0.000546521	0.000305589	0.0305589		0.137977
701	1185.8	423.4	451.7		0.00139528	0.000510159	0.000680815	0.000469576	0.0469576		0.137811
702	471.3	259.4	227.8		0.000554557	0.000312554	0.000343347	0.000131734	0.0131734		0.135359
703	402.8		163.4		0.000473956	0	0.000246281	0.000237039	0.0237039		0.133363
705	139		128.2		0.000163555	0	0.000193227	0.000104057	0.0104057		0.129158
706	1182.7	965.7	755.7		0.00139163	0.00116358	0.00113901	0.000139298	0.0139298		0.128929
708	256.7	124.8	214.7		0.000302047	0.000150373	0.000323602	9.44088e-05	0.00944088		0.127296
801	127.4		59.2		0.000149906	0	8.9228e-05	7.54046e-05	0.00754046		0.125966
805	1006.1	681.7	534.1		0.00118383	0.000821388	0.000805011	0.000214141	0.0214141		0.122187
904	523.6	125	179.6		0.000616096	0.000150614	0.000270698	0.000241659	0.0241659		0.121797
1002	592.7	41.5	695.8		0.000697403	5.00038e-05	0.00104873	0.000506625	0.0506625		0.120623
1004	3179.8	2789	3738.4		0.00374153	0.0033605	0.00563463	0.00121797	0.121797		0.118201
1010	2994.7	2077.1	3183.3		0.00352373	0.00250272	0.00479796	0.00114995	0.114995		0.11765
1011	2517	1221.6	2315		0.00296164	0.00147192	0.00348924	0.0010462	0.10462		0.117187
1102	908.1	252.9	885.2		0.00106852	0.000304722	0.0013342	0.000534446	0.0534446		0.116802
1103	4647	4616.9	6260.4		0.00546791	0.00556295	0.00943586	0.00226396	0.226396		0.1157
1106	1373	1322.6	777.8		0.00161555	0.00159361	0.00117232	0.000249805	0.0249805		0.114995
1110	973.1	1055.7	961.1		0.001145	0.00127202	0.0014486	0.00015247	0.015247		0.114899
1111	107.7	309	275.7		0.000126726	0.000372317	0.000415543	0.000155777	0.0155777		0.114679
1112	138.1		551.2		0.000162496	0	0.000830785	0.000440306	0.0440306		0.113574
1113	379.1		411.7		0.00044607	0	0.000620526	0.000320017	0.0320017		0.111103
1201	473.2		651.5		0.000556793	0	0.00098196	0.000492448	0.0492448		0.109829
1202	244.2		288.2		0.000287339	0	0.000434383	0.000220935	0.0220935		0.10959
1203	444.2		863.8		0.00052267	0	0.00130194	0.000655173	0.0655173		0.109507
1206	831.2	990.5	1040.8		0.000978035	0.00119346	0.00156872	0.000298927	0.0298927		0.108169
1208	1234.9	1629.1	1634.3		0.00145305	0.00196292	0.00246326	0.000505115	0.0505115		0.106379
1301	1430.6	767	1394.5		0.00168332	0.000924167	0.00210183	0.000596987	0.0596987		0.10462
1302	630.2		510.7		0.000741528	0	0.000769742	0.000436494	0.0436494		0.103766
1304	1032.2	422.9	991.4		0.00121454	0.000509557	0.00149427	0.000507429	0.0507429		0.103491
1305	168.2		234.9		0.000197913	0	0.000354048	0.000177434	0.0177434		0.102909
1307	2438.8	3189.4	2137.4		0.00286962	0.00384294	0.00322155	0.000492836	0.0492836		0.102012
1310	2788.3	3263.7	3223.8		0.00328087	0.00393247	0.00485901	0.000793052	0.0793052		0.0978495
1311	283		421.3		0.000332993	0	0.000634996	0.000317624	0.0317624		0.0978035
1402	52.4	182.9	634.7		6.16567e-05	0.000220378	0.000956638	0.000477539	0.0477539		0.0958293
1502	181.8	516.4	370.8		0.000213916	0.000622216	0.000558881	0.000219743	0.0219743		0.0951595
1503	118.9		227.6		0.000139904	0	0.000343045	0.000172491	0.0172491		0.0951083
1504	277.4	700.7	367.8		0.000326404	0.000844281	0.000554359	0.000259556	0.0259556		0.0945781
1608	2655.6	3806.4	2802.2		0.00312472	0.00458637	0.00422356	0.000761084	0.0761084		0.0943206
1609	393.5	481.8	302.7		0.000463013	0.000580526	0.000456238	6.98839e-05	0.00698839		0.0936206
1610	168		184.5		0.000197678	0	0.000278084	0.000143104	0.0143104		0.0920909
1704	759.2	1145.6	1224		0.000893316	0.00138035	0.00184485	0.000475811	0.0475811		0.0902127
1707	414.8	920	1737.5		0.000488076	0.00110852	0.00261881	0.0010959	0.10959		0.0894792
1708	136	465	297		0.000160025	0.000560283	0.000447647	0.000206406	0.0206406		0.0888712
1801	338.8	240.3	120.1		0.00039865	0.00028954	0.000181018	0.000108816	0.0108816		0.0879928
1802	808.2	894	1091		0.000950972	0.00107719	0.00164439	0.000369339	0.0369339		0.085178
1804	140.5		205.3		0.00016532	0	0.000309434	0.000154838	0.0154838		0.0847197
1806			182.4		0	0	0.000274919	0.000158724	0.0158724		0.0802161
1808			216.6		0	0	0.000326466	0.000188485	0.0188485		0.0793052
1902	301.8	760.1	207.9		0.000355114	0.000915853	0.000313353	0.000336446	0.0336446		0.0791354
2001	1423.6	1105.7	1384.7		0.00167509	0.00133227	0.00208706	0.000377923	0.0377923		0.0789018
2103	1121.6	535.8	913.8		0.00131974	0.000645591	0.00137731	0.000406856	0.0406856		0.0767784
2104	583.7	1594.1	1017.4		0.000686813	0.00192075	0.00153345	0.000631057	0.0631057		0.0761084
2105	1690.9	1340.3	959		0.0019896	0.00161494	0.00144543	0.000278457	0.0278457		0.0760555
2106	141.4	98.1			0.000166379	0.000118202	0	8.56102e-05	0.00856102		0.0753886
2107	5767.5	5813.3	4058.2		0.00678635	0.00700451	0.00611664	0.000462678	0.0462678		0.073698
2109	306.3		371.6		0.000360409	0	0.000560086	0.000283861	0.0283861		0.0700546
2202	972.4	1063.1	971.2		0.00114418	0.00128094	0.00146382	0.000160375	0.0160375		0.0695748
2207	939.7	682.5	723.5		0.0011057	0.000822352	0.00109048	0.00015938	0.015938		0.0685707
2210	1235.6	1515	914.8		0.00145387	0.00182544	0.00137881	0.000239155	0.0239155		0.0675542
2301	851.7	749.4	927.3		0.00100216	0.00090296	0.00139765	0.000261719	0.0261719		0.0671556
2302	1531.4	1364.2	1424		0.00180193	0.00164374	0.00214629	0.000256961	0.0256961		0.0671032
2303	166.2		498		0.00019556	0	0.0007506	0.000389383	0.0389383		0.0659129
2306	182.8	227.8	670.3		0.000215092	0.000274479	0.0010103	0.000442964	0.0442964		0.0655173
2308	278.3	433.1	363.3		0.000327463	0.000521847	0.000547576	0.000120345	0.0120345		0.0644591
2309	167.4	317.4	164.9		0.000196972	0.000382439	0.000248542	9.57303e-05	0.00957303		0.0639585
2401	692.5	847.4	1990.1		0.000814833	0.00102104	0.00299954	0.00120623	0.120623		0.0636089
2404	160.7	379.3	307.5		0.000189088	0.000457023	0.000463473	0.000156587	0.0156587		0.063219
2405	351.9	437.7	325.6		0.000414065	0.000527389	0.000490754	5.78301e-05	0.00578301		0.0631057
2501	715.3	488.3	882.8		0.000841661	0.000588358	0.00133058	0.000377294	0.0377294		0.062876
2502	389	221.5	214.1		0.000457719	0.000266888	0.000322698	9.81171e-05	0.00981171		0.061779
2503	385	730.1	894.1		0.000453012	0.000879705	0.00134761	0.000447459	0.0447459		0.0616626
2504	920.3	1302	631.7		0.00108287	0.00156879	0.000952117	0.000324937	0.0324937		0.061281
2507	770.4	1228.4	544.8		0.000906494	0.00148011	0.000821138	0.000358369	0.0358369		0.0610485
2509	292.4	172.7	191.9		0.000344054	0.000208088	0.000289237	6.84065e-05	0.00684065		0.060351
2601	3005.4	3767	2263.9		0.00353632	0.0045389	0.00341222	0.00061779	0.061779		0.0602798
2603	456.6	628.4	447.1		0.00053726	0.000757166	0.000673882	0.000111026	0.0111026		0.0602001
2605	510.1	552.2	96		0.000600211	0.000665352	0.000144694	0.000283673	0.0283673		0.0598981
2606	345.2	516.8	82.9		0.000406181	0.000622698	0.000124949	0.000249574	0.0249574		0.0596987
2607	277.5	457.6	62.5		0.000326522	0.000551367	9.42018e-05	0.000228593	0.0228593		0.0591781
2608	250.2	369.4	112.5		0.000294399	0.000445094	0.000169563	0.000137967	0.0137967		0.0588074
2701	113.3		208.7		0.000133315	0	0.000314559	0.000157887	0.0157887		0.0579071
2703	614.4	78.7	660.5		0.000722936	9.48265e-05	0.000995525	0.000461895	0.0461895		0.0578098
2705	782.7	823.3	731.4		0.000920967	0.000992003	0.00110239	9.14185e-05	0.00914185		0.0577241
2707		875.1	717.3		0	0.00105442	0.00108114	0.000616626	0.0616626		0.0575672
2708	357.3	432.4	462.5		0.000420419	0.000521003	0.000697094	0.000140044	0.0140044		0.0564531
2802	210.1		286.6		0.000247215	0	0.000431972	0.000216737	0.0216737		0.0564196
2807		99.1	1396.2		0	0.000119407	0.00210439	0.00118201	0.118201		0.0557365
2808			464.5		0	0	0.000700108	0.000404208	0.0404208		0.0556263
2905	198.9	419.4	586.2		0.000234037	0.00050534	0.000883538	0.000326213	0.0326213		0.0556166
2907	62.6	130.6			7.36586e-05	0.000157361	0	7.87341e-05	0.00787341		0.0545401
3001	4982.1	5127.5	3381.3		0.00586221	0.00617818	0.00509639	0.000556263	0.0556263		0.0544514
3005	20178.9	19343.5	20018.1		0.0237436	0.0233072	0.0301719	0.00384354	0.384354		0.0542932
3008	514.2	481.9	1001.6		0.000605036	0.000580646	0.00150964	0.000529455	0.0529455		0.0541389
3009	12292.1	10493	11455.8		0.0144636	0.0126431	0.0172665	0.00232903	0.232903		0.0540282
3010		520			0	0.000626554	0	0.000361741	0.0361741		0.0539723
3101	3575.1	4536.9	2897.7		0.00420666	0.00546656	0.0043675	0.000685707	0.0685707		0.0539535
3102	885.4	824.6	846.7		0.00104181	0.000993569	0.00127617	0.000151171	0.0151171		0.0534446
3107	1945	1592.1	2066.9		0.00228859	0.00191834	0.00311529	0.00061281	0.061281		0.0531816
3109	233.2		710.4		0.000274396	0	0.00107074	0.000556166	0.0556166		0.0531407
3110	740.4	563.3	1246.6		0.000871195	0.000678726	0.00187891	0.000644591	0.0644591		0.0529455
3201	1785.7	2280.7	1503.9		0.00210115	0.00274804	0.00226672	0.000336042	0.0336042		0.0528267
3202	1577.4	2112	1601.1		0.00185605	0.00254477	0.00241322	0.000365621	0.0365621		0.0526798
3301	262.1	258.6	349.3		0.000308401	0.00031159	0.000526475	0.000124995	0.0124995		0.0525694
3303	152.7	363.6	227.1		0.000179675	0.000438106	0.000342292	0.000130646	0.0130646		0.0525389
3304	129.9	319.3			0.000152847	0.000384728	0	0.000193712	0.0193712		0.0522177
3305	1814.2	3349.9	1909.9		0.00213469	0.00403633	0.00287866	0.000958293	0.0958293		0.0512182
3306	3298.2	4844.8	3204.9		0.00388084	0.00583755	0.00483052	0.000978495	0.0978495		0.050794
3401	1066.6	1185.5	905.9		0.00125502	0.00142842	0.0013654	8.77723e-05	0.00877723		0.0507429
3404	404.4	543.8	986.6		0.000475839	0.00065523	0.00148703	0.000539535	0.0539535		0.0506625
3405	642.6	1036.4	807.4		0.000756118	0.00124877	0.00121694	0.000275703	0.0275703		0.0506493
3407	640.7	1515.7	770		0.000753882	0.00182628	0.00116057	0.000541389	0.0541389		0.0505115
3410	1741.9	1796.7	2369.4		0.00204961	0.00216486	0.00357123	0.000847197	0.0847197		0.0499146
3411			464.8		0	0	0.00070056	0.000404469	0.0404469		0.0497229
3501	274	406.9	324.5		0.000322403	0.000490278	0.000489096	9.65831e-05	0.00965831		0.0492836
3502		2942.4	1460.3		0	0.00354533	0.00220101	0.00178983	0.178983		0.0492448
3504	905.6		876.2		0.00106558	0	0.00132063	0.000700546	0.0700546		0.0477539
3506	3273.1	4422.6	2686.2		0.00385131	0.00532884	0.00404872	0.000802161	0.0802161		0.0475811
3507	395.5	1266.8	778.3		0.000465367	0.00152638	0.00117308	0.000540282	0.0540282		0.0469576
3509	1388.8	3811.6	3482.8		0.00163414	0.00459264	0.00524938	0.00192588	0.192588		0.0462678
3602	1493.4	4878	1164.5		0.00175722	0.00587755	0.00175517	0.00237947	0.237947		0.0462236
3604	2645.5	4695.4	2450.2		0.00311284	0.00565754	0.00369301	0.00133363	0.133363		0.0461937
3605	19440.9	35642.3	16890.6		0.0228752	0.0429458	0.025458	0.0109188	1.09188		0.0461895
3606	1290.7	1899.9	1985.2		0.00151871	0.00228921	0.00299215	0.00073698	0.073698		0.0452432
3610	2437.3		861.7		0.00286786	0	0.00129878	0.00143605	0.143605		0.0447459
3701	256.9	510.9	209.2		0.000302282	0.000615589	0.000315312	0.000177246	0.0177246		0.0446922
3702	91.5	326.1	206.3		0.000107664	0.000392921	0.000310941	0.000146864	0.0146864		0.0446372
3703	526.6		693.6		0.000619626	0	0.00104541	0.000525694	0.0525694		0.0442964
3708	751.2		764.3		0.000883903	0	0.00115198	0.000602798	0.0602798		0.0442633
3710	123.3	899.1			0.000145081	0.00108334	0	0.000588074	0.0588074		0.0440306
3711	2459.7	4472.1	3971.1		0.00289422	0.00538848	0.00598536	0.00163975	0.163975		0.04384
3802	326.4	366.8	487.9		0.00038406	0.000441961	0.000735377	0.000188357	0.0188357		0.0436494
3803	96.2	1604	148.3		0.000113194	0.00193268	0.000223522	0.00102012	0.102012		0.0435509
3804		693.5	587		0	0.000835606	0.000884744	0.000497229	0.0497229		0.0431845
3805	954.4	1430.9	1618.6		0.001123	0.00172411	0.0024396	0.000659129	0.0659129		0.0431662
3811	396	436.7	828.4		0.000465955	0.000526185	0.00124859	0.000435509	0.0435509		0.0431158
3812	416.4	284.5	772.9		0.000489959	0.000342797	0.00116494	0.0004384	0.04384		0.0425931
3814	1160.5	2045.9	989		0.00136551	0.00246513	0.00149065	0.000602001	0.0602001		0.0424477
3817	2135.9	1788.4	3632.6		0.00251322	0.00215486	0.00547516	0.00182236	0.182236		0.0406856
4002	206.7	47	596.7		0.000243214	5.66308e-05	0.000899364	0.000442633	0.0442633		0.0404469
4101	795.2	1923.9	2060.2		0.000935675	0.00231813	0.00310519	0.00109829	0.109829		0.0404208
4102	1736.1	2135.8	1715		0.00204279	0.00257345	0.0025849	0.000309734	0.0309734		0.0398378
4104	309.8		318		0.000364527	0	0.000479299	0.00025026	0.025026		0.0396661
4107	1893	2072.3	811.2		0.00222741	0.00249694	0.00122266	0.000671556	0.0671556		0.0389383
4203	4773.8	3318.8	4064.9		0.00561711	0.00399886	0.00612674	0.00111103	0.111103		0.0388275
4204	1596.1	1903.5	1647.3		0.00187806	0.00229355	0.00248286	0.000309369	0.0309369		0.0387206
4205	436.7	81.4			0.000513845	9.80797e-05	0	0.000272799	0.0272799		0.0385662
4207	2153.3	2447.5	1939.4		0.00253369	0.00294902	0.00292312	0.000232675	0.0232675		0.0380403
4208	1128.3	5605.7	1744.4		0.00132762	0.00675437	0.00262921	0.00283316	0.283316		0.0377923
4209	413.7	1295.5	740.5		0.000486782	0.00156096	0.0011161	0.000539723	0.0539723		0.0377294
4210	61.5	284.3	361		7.23642e-05	0.000342556	0.00054411	0.000236704	0.0236704		0.0377181
4301	482	545.7	413.9		0.000567147	0.00065752	0.000623842	4.56721e-05	0.00456721		0.03758
4304	335.9	571.6	844.7		0.000395238	0.000688727	0.00127316	0.000446922	0.0446922		0.0375462
4305	307.9	523.5	467		0.000362292	0.000630771	0.000703876	0.000179863	0.0179863		0.0375234
4306	206.4		144.6		0.000242861	0	0.000217945	0.000133606	0.0133606		0.0369339
4401	374.4	103	578.6		0.000440539	0.000124106	0.000872083	0.000375462	0.0375462		0.036586
4403	248.6		396.6		0.000292516	0	0.000597767	0.000298906	0.0298906		0.0365621
4407	7093.8	11799.3	11478.5		0.00834695	0.0142171	0.0173007	0.00454858	0.454858		0.0361741
4411	214.1	392.2	470.1		0.000251922	0.000472566	0.000708548	0.000228356	0.0228356		0.0361152
4505	396.1	1241.8	785.7		0.000466073	0.00149626	0.00118423	0.000528267	0.0528267		0.0358544
4603	7549.5	11420.5	7217.3		0.00888315	0.0137607	0.0108781	0.00245219	0.245219		0.0358369
4606	169.6		262.5		0.000199561	0	0.000395648	0.000197826	0.0197826		0.0358211
4607	419.9	448.6	452.3		0.000494077	0.000540523	0.00068172	9.77271e-05	0.00977271		0.0352948
4608	155.7		149.4		0.000183205	0	0.00022518	0.000119744	0.0119744		0.0349749
4609	381.7	1370.2	445		0.000449129	0.00165097	0.000670717	0.000639585	0.0639585		0.0343863
4610	2341.4	3899.6	2346.2		0.00275502	0.00469867	0.00353626	0.000978035	0.0978035		0.0343422
4614	220.3		221.9		0.000259217	0	0.000334454	0.000175458	0.0175458		0.0342621
4615	863.6	313.1	689.7		0.00101616	0.000377258	0.00103954	0.0003758	0.03758		0.0339828
4703	515	1187.1	1182.1		0.000605977	0.00143035	0.0017817	0.00060351	0.060351		0.0336446
4705	457.6	696.8	792.8		0.000538437	0.000839582	0.00119493	0.00032862	0.032862		0.0336042
4706	272.1	533.1	273.6		0.000320168	0.000642338	0.000412378	0.000165921	0.0165921		0.032862
4707	119.8		303.1		0.000140963	0	0.000456841	0.000233935	0.0233935		0.0326213
4708	94.1		202.7		0.000110723	0	0.000305515	0.000154673	0.0154673		0.0324937
4711	782.9	1053	1319.5		0.000921203	0.00126877	0.00198879	0.000544514	0.0544514		0.0320017
4716	916.8	1253.5	1501		0.00107876	0.00151036	0.00226235	0.000598981	0.0598981		0.0317624
4807	996.6	662.6	769.5		0.00117265	0.000798374	0.00115981	0.000212481	0.0212481		0.0313549
4808	75	105.4	63.6		8.82491e-05	0.000126998	9.58598e-05	2.05302e-05	0.00205302		0.0312181
5001	1832.7	882.2	1892.6		0.00215645	0.00106297	0.00285258	0.000902127	0.0902127		0.0309734
5002	4231	2346.5	3411.2		0.00497842	0.00282732	0.00514146	0.00129158	0.129158		0.0309369
5003	4995.1	6052.9	5090		0.00587751	0.0072932	0.0076718	0.000945781	0.0945781		0.0307335
5005	78.6		185.1		9.2485e-05	0	0.000278988	0.00014211	0.014211		0.0306318
5009	175.7	210.4	553.7		0.000206738	0.000253513	0.000834553	0.000349749	0.0349749		0.0305589
5101	11437.7	11068.2	10191.9		0.0134582	0.0133362	0.0153615	0.00113574	0.113574		0.0298927
5104	4656.5	4280.2	3670.7		0.00547909	0.00515726	0.00553259	0.000203022	0.0203022		0.0298906
5105	3879.5	3807.2	2964.6		0.00456483	0.00458734	0.00446833	6.32199e-05	0.00632199		0.0293883
5106	209.8		489.1		0.000246862	0	0.000737186	0.000375234	0.0375234		0.0291904
5107	3153.2	1174.2	1762.5		0.00371023	0.00141481	0.00265649	0.00114899	0.114899		0.0288896
5108	1119.9	894.4	960		0.00131774	0.00107767	0.00144694	0.000187387	0.0187387		0.0288177
5110	1337.8	366.6	1455.9		0.00157413	0.00044172	0.00219437	0.000888712	0.0888712		0.0285116
5203	10638	10846	8557.8		0.0125172	0.0130685	0.0128986	0.000282284	0.0282284		0.0283861
5204	10210.2	12852.7	7601.7		0.0120139	0.0154864	0.0114575	0.00218324	0.218324		0.0283673
5205	30130.3	29831.1	19859.1		0.0354529	0.0359438	0.0299322	0.00333813	0.333813		0.0282733
5206	18941.6	23727.6	12104.2		0.0222877	0.0285896	0.0182438	0.00521382	0.521382		0.028257
5302	1309	2080.7	980.1		0.00154024	0.00250706	0.00147724	0.000577241	0.0577241		0.0282284
5401	703.9	990.3	856.5		0.000828247	0.00119322	0.00129094	0.000243873	0.0243873		0.0280975
5402	154.2	96.7	186.4		0.00018144	0.000116515	0.000280948	8.28202e-05	0.00828202		0.0278457
5403	1161.7	1143	895.2		0.00136692	0.00137721	0.00134927	1.41311e-05	0.00141311		0.0278409
5404		215.3	309.5		0	0.000259417	0.000466487	0.000233733	0.0233733		0.0275703
5405	5343.1	3793.7	2542.1		0.00628698	0.00457107	0.00383153	0.00125966	0.125966		0.0273291
5406	7087	11137	9260.9		0.00833895	0.0134191	0.0139583	0.00310042	0.310042		0.0272799
5409	976.7	852.3	785.4		0.00114924	0.00102695	0.00118378	8.24064e-05	0.00824064		0.0267624
5411	481.1	694.9	1431.9		0.000566088	0.000837292	0.0021582	0.00085178	0.085178		0.0265307
5412	335	349.4	950.3		0.000394179	0.000420996	0.00143232	0.000591781	0.0591781		0.0264418
5501	4662.4	9789	5426		0.00548603	0.0117949	0.00817823	0.00316569	0.316569		0.0261719
5502	988.9	1295.9	1276.6		0.00116359	0.00156144	0.00192413	0.000380403	0.0380403		0.0261361
5513	1356.2	1042.7	353.5		0.00159578	0.00125636	0.000532806	0.000542932	0.0542932		0.0259556
5514	531.5	879.1	654.3		0.000625392	0.00105924	0.00098618	0.000232281	0.0232281		0.0259531
5515	49841.2	10471.6	30034.1		0.0586459	0.0126173	0.0452683	0.0236772	2.36772		0.0259427
5520	37387.1	68509.7	31331		0.0439917	0.0825481	0.047223	0.0213888	2.13888		0.0258378
5601		1229.8	723		0	0.0014818	0.00108973	0.000767784	0.0767784		0.0257486
5602	7923.5	7975.7	4249.5		0.00932322	0.00961001	0.00640497	0.00177345	0.177345		0.0256961
5604	217.3	251.3	276.5		0.000255687	0.000302794	0.000416749	8.28107e-05	0.00828107		0.0253093
5704	1202.7	1096.4	1424.8		0.00141516	0.00132106	0.0021475	0.000452432	0.0452432		0.025026
5706	274	370.8	466.4		0.000322403	0.000446781	0.000702972	0.000194051	0.0194051		0.0249805
5708	318.3				0.000374529	0	0	0.000216234	0.0216234		0.0249574
5711	5928.9	6029.8	7379.3		0.00697627	0.00726537	0.0111223	0.00231477	0.231477		0.0245446
5713	607.1	262.7	772.9		0.000714347	0.00031653	0.00116494	0.000424477	0.0424477		0.0243873
5801	1382.9	1454.4	1092.1		0.0016272	0.00175242	0.00164605	6.75194e-05	0.00675194		0.0241659
5802		413.8	590.9		0	0.000498592	0.000890622	0.000446372	0.0446372		0.0239155
6003	2929	705.5	984.8		0.00344642	0.000850065	0.00148432	0.00135359	0.135359		0.0237039
6102	2318.3	1551.1	1213.2		0.00272784	0.00186894	0.00182857	0.00050794	0.050794		0.0236704
6103	4933	1987.7	3872.2		0.00580444	0.002395	0.00583629	0.0019777	0.19777		0.0235724
6107	12391.4	3072.4	2705.4		0.0145804	0.00370197	0.00407766	0.00617507	0.617507		0.0234966
6108	377.9		359.5		0.000444658	0	0.000541849	0.000288896	0.0288896		0.0233935
6201	633.7	95.7	544.1		0.000745646	0.00011531	0.000820083	0.000387206	0.0387206		0.0233733
6204	882.5	156.2	493.1		0.0010384	0.000188207	0.000743215	0.000431662	0.0431662		0.0232675
6206	18829.3	14686.8	11997.8		0.0221556	0.0176963	0.0180834	0.00247041	0.247041		0.0232281
6304	7110.2	3982.1	4888.1		0.00836625	0.00479808	0.00736749	0.0018408	0.18408		0.0228593
6307	406.3	220.7	369.6		0.000478075	0.000265924	0.000557072	0.000150563	0.0150563		0.0228356
6308	414.5	65.8	518.9		0.000487723	7.92831e-05	0.000782101	0.000352948	0.0352948		0.0220935
6402	1754.5	1200.8	2603.3		0.00206444	0.00144686	0.00392377	0.00128929	0.128929		0.0220322
6404		22.5	399.2		0	2.71105e-05	0.000601686	0.000339828	0.0339828		0.0219743
6405	21591.3	14519.7	10033.4		0.0254055	0.0174949	0.0151226	0.00538427	0.538427		0.0216737
6407	890.1	399.3	728.8		0.00104734	0.000481121	0.00109847	0.000342621	0.0342621		0.0216234
6412	2202.1	471	4312.6		0.00259111	0.000567513	0.00650008	0.0030158	0.30158		0.0214141
6413	2936.4	3235.5	3744.4		0.00345513	0.00389849	0.00564367	0.001157	0.1157		0.0212481
6414	62.7		56.6		7.37762e-05	0	8.53092e-05	4.62846e-05	0.00462846		0.0208029
6501	1243.3	509.7	1082.7		0.00146293	0.000614143	0.00163188	0.000545401	0.0545401		0.0207048
6506	5608.7	6132.3	4595		0.0065995	0.00738887	0.00692572	0.000396661	0.0396661		0.0207015
6507	392.2	165.7	507.3		0.000461484	0.000199654	0.000764617	0.000282733	0.0282733		0.0206406
6509	566.1	534.9	450.6		0.000666104	0.000644507	0.000679157	1.75e-05	0.00175		0.0203022
6512	2894.6	1952.3	1910.7		0.00340594	0.00235235	0.00287986	0.000526798	0.0526798		0.0202514
6601	3186.8	352	1696.1		0.00374976	0.000424129	0.00255641	0.00168476	0.168476		0.0197826
6604	304	82.6	714.5		0.000357703	9.95256e-05	0.00107692	0.000506493	0.0506493		0.0196393
6605	1712.4	1158.8	1180		0.0020149	0.00139625	0.00177853	0.000312181	0.0312181		0.0195725
6606	722	424.1	484.8		0.000849544	0.000511003	0.000730705	0.000171757	0.0171757		0.0195193
6608	1952.1		1392.9		0.00229695	0	0.00209942	0.00127296	0.127296		0.0194051
6609	224.8	383.6	450.1		0.000264512	0.000462204	0.000678404	0.000207015	0.0207015		0.0193712
6612	1153.1	200.8	968.9		0.0013568	0.000241946	0.00146035	0.000675542	0.0675542		0.0188485
6702		2659.7	1779.5		0	0.0032047	0.00268211	0.00171935	0.171935		0.0188357
6705	803.4	332.8	687.3		0.000945324	0.000400994	0.00103592	0.000343422	0.0343422		0.0187975
6706	1223.9	544.8	1097.7		0.00144011	0.000656435	0.00165449	0.000525389	0.0525389		0.0187387
6803	796.6	330.1	363.9		0.000937323	0.000397741	0.000548481	0.000278409	0.0278409		0.0184634
6805	240.6	178.1	213.5		0.000283103	0.000214595	0.000321793	5.42862e-05	0.00542862		0.0180227
7001	20688.3	6862.3			0.024343	0.00826846	0	0.0123783	1.23783		0.0180105
7002		332.4	197.6		0	0.000400512	0.000297828	0.000208029	0.0208029		0.0179863
7003	633.8	69.5	508.4		0.000745763	8.37413e-05	0.000766275	0.000388275	0.0388275		0.0177434
7101	3753.2	3044.8	5240.5		0.00441622	0.00366871	0.00789863	0.00225751	0.225751		0.0177257
7102	1847	877.9	2077.4		0.00217328	0.00105779	0.00313112	0.00103766	0.103766		0.0177246
7104	2189.2				0.00257593	0	0	0.00148721	0.148721		0.0175458
7105	685.7	381.9	407.1		0.000806832	0.000460155	0.000613593	0.000173719	0.0173719		0.0173719
7106	2192.8	1317.9	1445.9		0.00258017	0.00158795	0.0021793	0.000499146	0.0499146		0.0172491
7107	1909.3	912.8	1169.2		0.00224659	0.00109984	0.00176225	0.000575672	0.0575672		0.0171757
7201	873.1	432.8	1051.4		0.00102734	0.000521485	0.0015847	0.000531816	0.0531816		0.0165921
7202	1326.2	1451.2	1005.7		0.00156048	0.00174857	0.00151582	0.000123519	0.0123519		0.0160375
7203	261.1	548.5	307.1		0.000307224	0.000660894	0.00046287	0.000177257	0.0177257		0.0159467
7205	14530.2	7240.6	4437.9		0.017097	0.00872428	0.00668893	0.00551625	0.551625		0.015938
7206	887.5	424.5			0.00104428	0.000511485	0	0.000522177	0.0522177		0.0158724
7207	1221.3	1069.8	767.2		0.00143705	0.00128901	0.00115635	0.000140421	0.0140421		0.0157887
7209	550.3	444.4	884.5		0.000647513	0.000535462	0.00133314	0.000431845	0.0431845		0.0156587
7210	1498.8	1053.7	465.5		0.00176357	0.00126961	0.000701615	0.000531407	0.0531407		0.0155777
7301	505.8	11.2	686.4		0.000595152	1.3495e-05	0.00103456	0.000512182	0.0512182		0.0154838
7304			46.7		0	0	7.03876e-05	4.06383e-05	0.00406383		0.0154673
7305	560.2	1.7	384.3		0.000659162	2.04835e-06	0.000579228	0.000358544	0.0358544		0.015247
7308	361.3				0.000425125	0	0	0.000245446	0.0245446		0.0151171
7309	146.5	181.4	340.2		0.00017238	0.000218571	0.000512759	0.000184634	0.0184634		0.0150563
7401	1593.1	1195.3	1307.4		0.00187453	0.00144023	0.00197055	0.00028257	0.028257		0.0146864
7403	10183	6235.5	6149.5		0.0119819	0.00751322	0.00926871	0.00225136	0.225136		0.0143104
7408	1220.8	425	638.6		0.00143646	0.000512087	0.000962517	0.000462236	0.0462236		0.014211
7410		494.3			0	0.000595587	0	0.000343863	0.0343863		0.0140421
7414	4314.8	6090.2	5833.5		0.00507703	0.00733815	0.00879242	0.00187224	0.187224		0.0140044
7416	2156.5	1901.4			0.00253745	0.00229102	0	0.0013993	0.13993		0.0139813
7418	217.7	639.9	334.7		0.000256158	0.000771022	0.00050447	0.000257486	0.0257486		0.0139298
7507	471.7	291.8	304.7		0.000555028	0.000351593	0.000459253	0.000101775	0.0101775		0.0139255
7511	269.2		341.2		0.000316755	0	0.000514267	0.000259427	0.0259427		0.0137967
7602	333.4		141.4		0.000392297	0	0.000213122	0.000196393	0.0196393		0.0136346
7603	1935.9	1869.7	2854.9		0.00227789	0.00225282	0.00430299	0.0011765	0.11765		0.0133606
7609	1708.5	2264.8	1530		0.00201031	0.00272888	0.00230606	0.000361152	0.0361152		0.0132147
7617	2022.6	2146.6	1623.4		0.0023799	0.00258646	0.00244684	0.00010539	0.010539		0.0131734
7618	86.5		232.3		0.000101781	0	0.000350129	0.000180105	0.0180105		0.0131574
7619	551.2	1063.2	103.2		0.000648572	0.00128106	0.000155546	0.000564196	0.0564196		0.0130646
7704	702.7	440.9	584		0.000826835	0.000531245	0.000880222	0.000187975	0.0187975		0.0124995
7705	224.7	171.1	133.6		0.000264394	0.00020616	0.000201366	3.50874e-05	0.00350874		0.0123519
7706		726.2	687.1		0	0.000875006	0.00103562	0.000557365	0.0557365		0.0120345
7709	93.3	186.8	66.6		0.000109782	0.000225077	0.000100381	6.94388e-05	0.00694388		0.0119744
8009	1182.6	1536	1269.8		0.00139151	0.00185074	0.00191388	0.000285116	0.0285116		0.0112585
8010	20300.5	24728.4	18980.8		0.0238867	0.0297955	0.0286084	0.00312566	0.312566		0.0111026
8101	964	724.8	608.3		0.00113429	0.000873319	0.000916848	0.000139813	0.0139813		0.0108816
8102	2387.1	1732.8	2739.2		0.00280879	0.00208787	0.0041286	0.00103491	0.103491		0.010539
8103	5582.6	3948.7	4030.8		0.00656879	0.00475783	0.00607534	0.000936206	0.0936206		0.0104057
8108	1086.1	1509.7	1071.8		0.00127796	0.00181905	0.00161545	0.000273291	0.0273291		0.0101775
8109	4525	2698.5	2489.2		0.00532436	0.00325145	0.00375179	0.00108169	0.108169		0.00981171
8207	921.7	709.7	552.7		0.00108452	0.000855125	0.000833046	0.000139255	0.0139255		0.00977271
8209	263.3		305.8		0.000309813	0	0.000460911	0.000234966	0.0234966		0.00965831
8303	272.7		200.8		0.000320874	0	0.000302652	0.000180227	0.0180227		0.00957303
8306	885.1	435.8	508		0.00104146	0.0005251	0.000765672	0.000258378	0.0258378		0.00944088
8307	252.9	136	496.6		0.000297576	0.000163868	0.00074849	0.000306318	0.0306318		0.00914185
8308	593.2	487.5	482		0.000697991	0.000587394	0.000726484	7.34731e-05	0.00734731		0.00877723
8401	19063.7	8962.4	4274.9		0.0224314	0.0107989	0.00644325	0.00826546	0.826546		0.00873644
8402	6680.7	10078.9	4354.7		0.00786087	0.0121442	0.00656353	0.00292043	0.292043		0.00856102
8412		487.7	187.8		0	0.000587635	0.000283058	0.000293883	0.0293883		0.00828202
8413	963.5	872.8			0.00113371	0.00105165	0	0.00063219	0.063219		0.00828107
8415	2935.9	3742.5	1731.7		0.00345454	0.00450938	0.00261007	0.000951595	0.0951595		0.00824064
8502	422.2		220.6		0.000496783	0	0.000332495	0.000253093	0.0253093		0.00787341
8506	424.2				0.000499137	0	0	0.000288177	0.0288177		0.00754046
8510	775.2	539.9	198.8		0.000912142	0.000650531	0.000299637	0.000307335	0.0307335		0.00734731
8512	1261.7	920.4	230.9		0.00148458	0.001109	0.000348019	0.000579071	0.0579071		0.00698839
8513	567.7				0.000667987	0	0	0.000385662	0.0385662		0.00694388
9002	2193.7	715.4	1609.9		0.00258123	0.000861993	0.00242649	0.000951083	0.0951083		0.00684065
9003	400.6		151.4		0.000471368	0	0.000228195	0.000235724	0.0235724		0.00675194
9006	118.5	615.2	981.4		0.000139434	0.000741261	0.00147919	0.000671032	0.0671032		0.00632199
9008	80.9	2372.7	1060.9		9.51913e-05	0.00285889	0.00159902	0.00138364	0.138364		0.00594248
9101	4793.8	2869	2921.9		0.00564065	0.00345689	0.00440397	0.00109507	0.109507		0.00578301
9302	424.4	158	365.9		0.000499372	0.000190376	0.000551495	0.000195193	0.0195193		0.00542862
9401	8941.6	10495	5731		0.0105212	0.0126455	0.00863793	0.00200501	0.200501		0.00462846
9406	3375	24932.6	1150.7		0.00397121	0.0300416	0.00173437	0.0157372	1.57372		0.00456721
9501	1.9	522.3	211.5		2.23564e-06	0.000629325	0.000318779	0.000313549	0.0313549		0.00406383
9503	3605.4	2646.8	1845.3		0.00424231	0.00318916	0.00278129	0.000753886	0.0753886		0.00350874
9504	950.9	4177.9	1794		0.00111888	0.005034	0.00270397	0.00196933	0.196933		0.00205302
9601	202.1	788.6	56.1		0.000237802	0.000950193	8.45556e-05	0.000461937	0.0461937		0.00175
9802	558.4	972.6	554.8		0.000657044	0.0011719	0.000836211	0.000261361	0.0261361		0.00141311
	849867	829937	663469

## Sheet: 132h
Bio-Rad Laboratories
sorted by:SSP
SSP	132h-1	132h-2	132h-3
3	30.5	669.2	4.3		0.00386686	0.078743	0.00053595	0.0442227		2.20426	97.7957	>2%	2	0.00613497
7		11.1	8.2		0	0.00130611	0.00102204	0.000686923		2.00672		1-2%	1	0.00306748
8	5174.4	11729.5	8466.9		0.656022	1.38018	1.05531	0.362715		1.91381		<1%	323	0.990798
10	11918.6	14538	12156.6		1.51107	1.71065	1.51519	0.114055		0.968533
12	2872.6	3567.9	2161		0.364195	0.419825	0.269346	0.0760865		0.889877
20	1970.7	2231.9	2370.9		0.24985	0.262622	0.295508	0.023556		0.810808
21	3772.4	4777.6	4665.8		0.478273	0.562167	0.581544	0.0548914		0.726771
102	2019.6	2305.2	1732.6		0.256049	0.271247	0.215951	0.0285673		0.690265
103	334.6	503.5	426.6		0.0424213	0.0592455	0.0531713	0.00851968		0.688656
107	106.3	326.5			0.013477	0.0384184	0	0.0194922		0.654897
108	4219	5030.2			0.534894	0.59189	0	0.326521		0.645884
110	2278.9	2021.9	603.4		0.288924	0.237912	0.0752075	0.111617		0.609943
201	212	638.7	535.8		0.0268778	0.0751541	0.0667819	0.0257974		0.49809
202	61.8	282.5	122		0.00783514	0.033241	0.015206	0.0130706		0.495017
204	161.7	488.9	531.6		0.0205007	0.0575275	0.0662584	0.0242933		0.473057
205	1149.5	1433.3	1257.5		0.145736	0.168653	0.156734	0.0114613		0.464784
207	4617.8	8800.7	6624		0.585455	1.03555	0.825613	0.225219		0.440849
208	1446	1317.8	1510.5		0.183327	0.155062	0.188268	0.0179164		0.406758
209	1897	1848.7	1279.7		0.240506	0.217532	0.159501	0.0417474		0.391745
211	2861.9	1664.4	2065.4		0.362838	0.195845	0.257431	0.0844492		0.37611
212	954.1	370.4			0.120963	0.043584	0	0.0612632		0.368668
213		1215.5	854.3		0	0.143025	0.10648	0.0743073		0.362715
301	35.6	269	14.4		0.00451345	0.0316525	0.00179481	0.0165096		0.360788
302	601.7	1874	644.6		0.0762849	0.220509	0.0803427	0.0821212		0.344344
303	396.4	513.2	418		0.0502565	0.0603869	0.0520994	0.00539604		0.326521
305		2070.5	824.2		0	0.24363	0.102728	0.122313		0.302194
306	658.5	1000.3			0.0834861	0.117703	0	0.0605456		0.287606
307		678.7	78.9		0	0.0798608	0.00983407	0.0435473		0.281188
308	138.3				0.017534	0	0	0.0101233		0.260979
310	506.5	622.2	90.8		0.0642152	0.0732126	0.0113173	0.0334419		0.252114
311	228.1	195.7			0.028919	0.0230275	0	0.0152823		0.250203
312	1355.6	478.8			0.171866	0.0563391	0	0.0876151		0.241648
404	310.2	284.4	261.4		0.0393279	0.0334646	0.0325808	0.00366701		0.240643
406		2082			0	0.244983	0	0.141441		0.238017
502	239.5	270.9	618.9		0.0303643	0.0318761	0.0771395	0.02658		0.235719
504	42.7	347.5	319.4		0.0054136	0.0408894	0.0398099	0.0201776		0.227868
505	464.5	242.5	740.6		0.0588904	0.0285343	0.0923081	0.0318991		0.226233
506	38.5	11.3	446.1		0.00488112	0.00132964	0.0556017	0.0303608		0.225791
601	1080.7	2826.7	228		0.137014	0.33261	0.0284178	0.154156		0.225219
602	1013.4	4488.1	300.9		0.128481	0.528103	0.0375041	0.260979		0.222572
603	61.6	99.2	177.7		0.00780979	0.0116726	0.0221485	0.00741915		0.222115
701	102.8	424.3			0.0130332	0.0499262	0	0.0258959		0.22179
705	110	124.8	5.2		0.013946	0.0146849	0.000648126	0.00789948		0.215905
706	768.6	610			0.0974448	0.0717771	0	0.0505079		0.214957
905		75.1			0	0.00883682	0	0.00510194		0.210404
1004	275.4	1526.3	1552.1		0.0349158	0.179596	0.193453	0.087805		0.208648
1010	1243.1	2270.4	1719.7		0.157603	0.267152	0.214343	0.0547862		0.207211
1011	2537	2671.5	1863.4		0.321647	0.314348	0.232253	0.0496386		0.204217
1102	614.3	695.1	765.2		0.0778823	0.0817905	0.0953742	0.00918112		0.189602
1103	8202.7	8378.9	9068.3		1.03996	0.985923	1.13027	0.0729293		0.177245
1110	277.7		853		0.0352074	0	0.106318	0.0541597		0.168806
1111	186.6	299.3			0.0236576	0.0352178	0	0.0179519		0.168213
1112	675.6	1315.4	1702.8		0.0856541	0.15478	0.212236	0.0633807		0.167714
1113	251.9	279.5	599.1		0.0319364	0.032888	0.0746716	0.0244031		0.161991
1201	350.2	633.9			0.0443991	0.0745893	0	0.0375195		0.161204
1202	149.5	134.9			0.0189539	0.0158733	0	0.0101711		0.154156
1203	493	463.2			0.0625036	0.0545035	0	0.0340131		0.150894
1206	776	1242.8	1218.2		0.098383	0.146237	0.151836	0.0293785		0.149617
1208	5015.3	4210.8	7698.9		0.635851	0.495474	0.959588	0.238017		0.141441
1301	1121.5	734.1	1721.7		0.142186	0.0863796	0.214592	0.0642851		0.139681
1302	566	85.9			0.0717587	0.0101076	0	0.0388423		0.1388
1304	528.3	414	599.9		0.0669791	0.0487143	0.0747713	0.0133747		0.135197
1307	1736.2	1774.6	1813.4		0.220119	0.208812	0.226021	0.00874485		0.134852
1310	4475	5619.5	8138.6		0.567351	0.661231	1.01439	0.235719		0.131817
1311	1157.2	951.7			0.146712	0.111984	0	0.0766714		0.131759
1402	172.7	203.9	1067.4		0.0218953	0.0239924	0.13304	0.0635729		0.130016
1502	247.9	423.1	344.3		0.0314293	0.049785	0.0429134	0.00927394		0.125191
1503	329.5	339.2	177.8		0.0417747	0.0399128	0.0221609	0.0108266		0.122625
1504	374.9	618.8			0.0475307	0.0728125	0	0.0369685		0.122313
1608	3149.2	2589.7			0.399263	0.304723	0	0.208648		0.12078
1609	339.7	246.8			0.0430679	0.0290403	0	0.0219657		0.117946
1704	461.6	263.2			0.0585227	0.03097	0	0.029278		0.116051
1707	281.1	256.7			0.0356385	0.0302052	0	0.0192006		0.116035
1708	249	144			0.0315688	0.0169441	0	0.0157986		0.115227
1801		257.1			0	0.0302523	0	0.0174662		0.114741
1802	741.1				0.0939583	0	0	0.0542469		0.114055
1804	79.6	62.8	66.2		0.0100919	0.00738951	0.00825114	0.00138042		0.113536
1806	196.7		190		0.0249381	0	0.0236815	0.0140493		0.111617
1808	288.1	121.7			0.036526	0.0143201	0	0.0184043		0.110242
1902	238.6				0.0302502	0	0	0.017465		0.107257
2001	764.4	953.8			0.0969123	0.112231	0	0.0608584		0.103526
2103	368.7	322.1	208.2		0.0467446	0.0379006	0.02595	0.0104359		0.10153
2104	1204.7	895.8	1806.9		0.152735	0.105406	0.225211	0.0603408		0.0984789
2105	1159.5	1257.3	547.1		0.147004	0.147943	0.0681903	0.0457766		0.0984116
2106	251.8	329.4			0.0319238	0.0387596	0	0.0206888		0.0963519
2107	6647.5	6861.5	6984.3		0.842785	0.807374	0.87052	0.0316508		0.0891265
2109	268.7	349.7	367.1		0.0340664	0.0411483	0.0457552	0.00588792		0.0879488
2202	378.1	939	841.2		0.0479364	0.11049	0.104847	0.0346014		0.087805
2207	759	673.6	684.5		0.0962277	0.0792607	0.0853158	0.00859858		0.0877333
2210	1616.7	1962.5	1692.7		0.204969	0.230922	0.210977	0.0135859		0.0876151
2211	568.8	614.6	1089.2		0.0721137	0.0723183	0.135757	0.0366858		0.0873625
2301	352.1	635.7	217.9		0.04464	0.0748011	0.027159	0.0241007		0.0862775
2302	757.3	1015.5	733		0.0960122	0.119491	0.0913608	0.0150787		0.0844492
2308	344.2	500	480.6		0.0436384	0.0588337	0.0599018	0.009097		0.082786
2401	255.7	396.5	1992.7		0.0324182	0.0466551	0.248369	0.12078		0.0826949
2405	430.3	516.1	282.2		0.0545544	0.0607281	0.0351733	0.0133341		0.0821212
2501	638.7	569.9	490		0.0809758	0.0670586	0.0610734	0.0102112		0.0813049
2502	291.4	497.9	466.9		0.0369443	0.0585866	0.0581942	0.0123834		0.081082
2503	837.7	487.1	986.6		0.106205	0.0573157	0.122969	0.0341117		0.0808907
2504		1389.7	1106.3		0	0.163522	0.137889	0.0879488		0.0798044
2507	847.7	748.4	583.3		0.107473	0.0880622	0.0727023	0.0174248		0.0794121
2509	334.9	226.9	278.1		0.0424594	0.0266987	0.0346623	0.00788048		0.078664
2601	2925.3	2505.3	2404.7		0.370876	0.294792	0.299721	0.0425757		0.0778474
2603	1153.1	1410.9	1560.9		0.146193	0.166017	0.19455	0.024309		0.0777528
2605	566.3	271.4			0.0717968	0.0319349	0	0.0359713		0.0766714
2606	406.7	196.9			0.0515623	0.0231687	0	0.0258253		0.0761845
2701			375.9		0	0	0.046852	0.02705		0.0760865
2703	249.8	211	384.1		0.0316702	0.0248278	0.0478741	0.0118358		0.0751894
2705	304.5	479.2			0.0386052	0.0563862	0	0.0288269		0.0743073
2707			249.7		0	0	0.0311225	0.0179686		0.0743062
2708	421.2	316.8			0.0534007	0.037277	0	0.0273897		0.0735149
2802	724.4	862.9			0.0918411	0.101535	0	0.0560329		0.0729293
2807	57.4	220.5	1046.8		0.0072773	0.0259456	0.130473	0.0663972		0.0726749
2905	433.7	145.6			0.0549855	0.0171324	0	0.0281359		0.0714288
3001	3005.7	4683	4020.6		0.381069	0.551036	0.501126	0.0873625		0.0684891
3005	1557.1	12685.1			0.197413	1.49262	0	0.810808		0.0684339
3008	783.4	1028.3	1363.5		0.0993212	0.120997	0.169946	0.0361795		0.0679117
3009	1474.1	1667.8	3999.2		0.18689	0.196246	0.498459	0.177245		0.0673102
3010	5914.6	2.2	7567.9		0.749866	0.000258868	0.94326	0.49809		0.0663972
3101	3231.5	2625	4364.4		0.409697	0.308877	0.543977	0.117946		0.0659197
3102	509.3	240.4	406.9		0.0645702	0.0282872	0.0507159	0.0183096		0.0644392
3107	1903	1872.7	1944.1		0.241267	0.220356	0.242312	0.0123858		0.0642851
3110	50.5	89.7	860.5		0.0064025	0.0105548	0.107252	0.0570648		0.0635729
3201	1455.4	1640.1	1594.4		0.184519	0.192986	0.198725	0.00714679		0.0634503
3202	1715.3	1910.5	1482.5		0.21747	0.224803	0.184778	0.0213093		0.0633807
3203	624.7	170.5	1373.9		0.0792009	0.0200623	0.171242	0.0761845		0.0614197
3305	2147.9	2376.8	2050.4		0.272316	0.279672	0.255561	0.0123568		0.0612632
3306	5618	11255.8	11893		0.712263	1.32444	1.48234	0.406758		0.0609561
3401	1063.3	763.6	951.4		0.134808	0.0898508	0.118582	0.0227665		0.0608584
3404	1485.1	937.1	4236.3		0.188284	0.110266	0.528011	0.222115		0.0605456
3405	422.4	533.1	802.1		0.0535528	0.0627284	0.0999734	0.0245841		0.0603408
3407		1209.8	2111.9		0	0.142354	0.263226	0.131759		0.0599149
3410	3462.9	1429.1	3650.7		0.439034	0.168158	0.455022	0.161204		0.0593375
3501	1269.5	316.8	1325.8		0.16095	0.037277	0.165247	0.0726749		0.0586936
3502	2149	2234.1	2551.6		0.272455	0.262881	0.31803	0.0294684		0.0579514
3506	3723.3	2231.7	5733.8		0.472048	0.262598	0.714659	0.226233		0.0577816
3507	880.7	828.5	1365.9		0.111657	0.0974874	0.170245	0.0385726		0.0577166
3509	2800.1	1137.6	2958.3		0.355003	0.133858	0.368721	0.131817		0.0574031
3510	88.5	226.8	311.9		0.0112202	0.0266869	0.0388751	0.0138598		0.0573778
3511	122	160.9	443.1		0.0154674	0.0189327	0.0552278	0.0220236		0.0571388
3602	2264.7	4008.1	3696.7		0.287124	0.471622	0.460755	0.103526		0.0570648
3604	5482.8	3048.4	4222.7		0.695122	0.358697	0.526316	0.168213		0.0565683
3605	33679.3	29038.5	27993.1		4.26994	3.41688	3.48905	0.473057		0.0560329
3606	2743.4	2582.2	1871.6		0.347814	0.303841	0.233276	0.0577816		0.0557534
3701	237.5	80.2			0.0301108	0.00943692	0	0.0154009		0.0553994
3711	5561.7	3080.1	2478.9		0.705125	0.362427	0.308969	0.214957		0.0548914
3803	1226	486	848.7		0.155435	0.0571863	0.105782	0.0491253		0.0547862
3804	385.5				0.0488746	0	0	0.0282177		0.0547004
3805	685.7	335.3			0.0869346	0.0394538	0	0.043529		0.054581
3811	73.4				0.00930582	0	0	0.00537272		0.0543994
3812	106.9				0.013553	0	0	0.00782484		0.0542469
3814	662	1140.5	1561.1		0.0839298	0.1342	0.194575	0.0553994		0.0542048
3817	1426.7	571.4	2620.4		0.18088	0.0672351	0.326606	0.130016		0.0541597
4005	2302.9	904.7	2567.1		0.291967	0.106454	0.319962	0.116035		0.050936
4101	2565	2397.2	4353.9		0.325196	0.282072	0.542668	0.139681		0.0505079
4102	1012	1054.2	2210.9		0.128304	0.124045	0.275566	0.0862775		0.0504462
4107	607.1	1496	1115.6		0.0769695	0.17603	0.139048	0.0500574		0.0500574
4108	213	293.4	456.2		0.0270046	0.0345236	0.0568606	0.0155288		0.0496386
4203	5854.9	4908.8	4032.2		0.742297	0.577605	0.502572	0.122625		0.0493753
4204		1123.6	2226.4		0	0.132211	0.277498	0.1388		0.0491864
4205	252.7	718.1	419.9		0.0320379	0.0844969	0.0523362	0.0264521		0.0491253
4207	1445.3	2375.9	1818		0.183238	0.279566	0.226595	0.0482436		0.0482436
4208	1144.2	2507.4	1479.9		0.145064	0.295039	0.184454	0.0777528		0.0475306
4209	154.7	579.3	1846.5		0.0196132	0.0681647	0.230147	0.110242		0.0469712
4211	1465.3				0.185774	0	0	0.107257		0.0457766
4301			554		0	0	0.0690503	0.0398662		0.0452645
4304	1133.9	782.5	1028.2		0.143758	0.0920747	0.128154	0.0265092		0.0442227
4305	591.5	425.2	498.3		0.0749917	0.0500321	0.0621079	0.012482		0.0440214
4306					0	0	0	0		0.0436976
4307	1095.8	1923.4	1469.3		0.138928	0.226321	0.183133	0.0436976		0.0435473
4308	731.2	608.2	1213.2		0.0927032	0.0715653	0.151213	0.0412592		0.043529
4401	135.3		187.8		0.0171536	0	0.0234073	0.0121193		0.0425757
4407	13295.5	8023	18639.9		1.68563	0.944045	2.32327	0.690265		0.0422784
4411		515.2	316.4		0	0.0606222	0.039436	0.0307655		0.0421891
4505	818.8	2403	2952.8		0.103809	0.282755	0.368036	0.134852		0.0417474
4506	236.3	179.2			0.0299586	0.021086	0	0.0153886		0.0412592
4508	73.6	238.7	1482.7		0.00933117	0.0280872	0.184803	0.0963519		0.0412057
4509	414.2	418.2	621		0.0525132	0.0492085	0.0774012	0.0154119		0.0398662
4603	9733.6	10262.9	9535		1.23405	1.20761	1.18844	0.0229008		0.0389274
4606	86.7	183.6	265.9		0.010992	0.0216037	0.0331417	0.0110781		0.0388423
4608	366.3	381.7	427.9		0.0464403	0.0449136	0.0533333	0.00448581		0.0385726
4609	797.7	542.9	871		0.101134	0.0638816	0.108561	0.0239415		0.0375195
4610		3778.9	3099.5		0	0.444653	0.386321	0.241648		0.0369685
4615	327.8	403	429.3		0.0415592	0.0474199	0.0535078	0.00597464		0.0366858
4703	797.7	393.8	1188.3		0.101134	0.0463374	0.148109	0.050936		0.0361795
4705	843.1	400.5	1246.3		0.10689	0.0471258	0.155338	0.0542048		0.0359713
4706	156		91.1		0.019778	0	0.0113547	0.00992515		0.0346014
4711	1744.1	1237.6	2095.8		0.221121	0.145625	0.26122	0.0586936		0.0341117
4716	1541.9	851.2	1994.1		0.195486	0.100158	0.248544	0.0751894		0.0340131
4807	348.9	489.7	352.7		0.0442343	0.0576217	0.0439604	0.00780947		0.0334419
5001	870.2	1193.6	473		0.110326	0.140448	0.0589545	0.0412057		0.0325801
5002	403.7	423.4	385.8		0.051182	0.0498203	0.048086	0.00155175		0.0318991
5003	4645.7	11326.2	6926.1		0.588992	1.33272	0.863266	0.37611		0.0316508
5101	7702.6	1641.2	4628.7		0.976553	0.193116	0.576919	0.391745		0.0307655
5104	5528.1	6382.5	4777.2		0.700865	0.751012	0.595428	0.0794121		0.0303608
5105	3849.8	4238	4638		0.488086	0.498674	0.578079	0.0491864		0.0300556
5106	326.1	447.4	530.9		0.0413437	0.0526444	0.0661712	0.0124304		0.0294684
5107	3240.5	2842.1	5259		0.410838	0.334422	0.65548	0.167714		0.0293785
5108	1723.9	1206.5	726.1		0.21856	0.141966	0.0905008	0.0644392		0.029278
5110	170.1	240.2			0.0215657	0.0282637	0	0.0147692		0.0288654
5112	1031.4	932.3	1946.4		0.130763	0.109701	0.242599	0.0714288		0.0288269
5113	500.3	208.8	357.4		0.0634292	0.0245689	0.0445462	0.0194327		0.0285673
5203	11769.2	13137.7	11452		1.49213	1.54588	1.42737	0.0593375		0.0282748
5204	14079.2	29930.6	23987.3		1.78499	3.52185	2.98977	0.889877		0.0282177
5205		35094.8	27290.1		0	4.12951	3.40143	2.20426		0.0281359
5206	16830.3	19649.9	19526.6		2.13378	2.31215	2.43379	0.150894		0.0273897
5208	212.7	402.2	361.9		0.0269666	0.0473258	0.0451071	0.0111691		0.02705
5209	608.8	862.5	464.4		0.077185	0.101488	0.0578826	0.0218504		0.0268461
5302	1505.4	732	845.1		0.190858	0.0861325	0.105333	0.0557534		0.02658
5401	1349.7	1451.6	1616.8		0.171118	0.170806	0.201517	0.0176419		0.0265092
5403	1090.8	1125.1	1027		0.138294	0.132387	0.128005	0.00516337		0.0264807
5404		588.7	1321.4		0	0.0692707	0.164699	0.0826949		0.0264521
5405	5962.2	5487.1	5399.9		0.755901	0.645652	0.673041	0.0574031		0.0260936
5406	16301.6	13193.7	12312.8		2.06675	1.55247	1.53466	0.302194		0.0258959
5407		1449.9	2598.1		0	0.170606	0.323826	0.161991		0.0258253
5409	1065	704	786.2		0.135023	0.0828378	0.0979917	0.0268461		0.0257974
5411	1136.4	769.4	1131		0.144075	0.0905332	0.140967	0.0300556		0.0245841
5412	909	1539.9	2478.7		0.115245	0.181196	0.308944	0.0984789		0.0244384
5413	249.1	449.8	1158.3		0.0315815	0.0529268	0.14437	0.0599149		0.0244031
5501	6027.8	4595.1	5669.1		0.764218	0.540693	0.706594	0.116051		0.024309
5502	2125.2	1597.5	2511		0.269438	0.187974	0.31297	0.0634503		0.0242933
5513	4539.4	1151.7	2461.4		0.575515	0.135517	0.306788	0.22179		0.0241007
5514	716.2	361.7	1016		0.0908014	0.0425603	0.126634	0.0421891		0.0239735
5515	63533.6	36653.4	39533.6		8.05493	4.31291	4.92745	2.00672		0.0239415
5520	45857.3	39325.7	31247.1		5.81389	4.62735	3.89463	0.968533		0.0237056
5601	513.6	948.4	946.8		0.0651154	0.111596	0.118009	0.0288654		0.023556
5602	7956.2	6857	7436.4		1.0087	0.806845	0.92687	0.10153		0.0229008
5704	1460.1	815.5	1560.8		0.185115	0.0959577	0.194538	0.0543994		0.0227665
5706	66.6		127.2		0.0084437	0	0.0158542	0.00793269		0.0227003
5711	10331.1	3638.6	7032.4		1.3098	0.428144	0.876516	0.440849		0.0220236
5801	934.1	2290.9	1816.3		0.118427	0.269564	0.226383	0.0778474		0.0219657
5802		167	202.3		0	0.0196504	0.0252146	0.0132469		0.0218598
6003	2502.6	1144.2	6663.3		0.317285	0.134635	0.830511	0.360788		0.0218504
6102	2693.2	2136.9	2445.9		0.34145	0.251443	0.304856	0.0452645		0.0213093
6103	14972.2	5792.9	9725		1.89821	0.681635	1.21212	0.609943		0.0207587
6107	2513.1	1770.6	3246.7		0.318616	0.208342	0.404667	0.0984116		0.0206888
6108					0	0	0	0		0.0201776
6111	388.7	682.2	1529.6		0.0492803	0.0802726	0.190649	0.0743062		0.0199307
6201	1294.8	1085.3	1915		0.164158	0.127704	0.238685	0.0565683		0.0199188
6204	845.4	576.1	983.8		0.107182	0.0677881	0.12262	0.0282748		0.0198927
6206	13562.5	21094.4	21241.5		1.71948	2.48212	2.64753	0.495017		0.0194922
6304	10683.4	8443.8	11229.8		1.35447	0.993559	1.39968	0.222572		0.0194327
6306	1139.9	614	254.5		0.144519	0.0722477	0.0317208	0.0571388		0.0192006
6402	3146.1	1045.1	4833.5		0.39887	0.122974	0.602446	0.240643		0.0186461
6404		92.6	231.3		0	0.010896	0.0288291	0.014557		0.0185697
6405	8483	19037.5	17465.4		1.07549	2.24009	2.17688	0.654897		0.0184043
6407	744.7	614.7	877.7		0.0944147	0.0723301	0.109396	0.0186461		0.0183096
6408	1367	1228.2	3344.5		0.173311	0.144519	0.416857	0.149617		0.0179686
6409		1683.3	1858.8		0	0.198069	0.23168	0.125191		0.0179519
6412	2207	1024.3	4264.3		0.279808	0.120527	0.531501	0.207211		0.0179164
6413	4161.8	3254.3	6479.6		0.527642	0.382925	0.807615	0.215905		0.0176419
6414	501.7	435.6	666.7		0.0636067	0.0512559	0.0830972	0.0160535		0.0176246
6501	1079.9	336	891.3		0.136912	0.0395362	0.111091	0.0504462		0.0174662
6506	2336.2	2190.3	1309.4		0.296189	0.257727	0.163203	0.0684339		0.017465
6507	7529.5	3340.8	5624		0.954607	0.393103	0.700973	0.281188		0.0174248
6509	178.5	312.9			0.0226306	0.0368181	0	0.0185697		0.0165096
6512	2377.4	1186.7	1778.2		0.301412	0.139636	0.221634	0.0808907		0.0160535
6601	830.9	182.9	1580		0.105343	0.0215214	0.196931	0.0877333		0.0157986
6604	80.7		402.1		0.0102313	0	0.0501176	0.0264807		0.0155288
6605	1693.8	1220.3	1077.2		0.214744	0.143589	0.134262	0.0440214		0.0154119
6606	1394.6	519.6	1005.5		0.176811	0.0611399	0.125325	0.0579514		0.0154009
6608	2426	1371	1341.7		0.307574	0.161322	0.167229	0.082786		0.0153886
6609	164.9	151.3	228.7		0.0209064	0.0178031	0.0285051	0.00550612		0.0152823
6612	7847.6	4661.3	6827.4		0.994936	0.548483	0.850965	0.227868		0.0150787
6702	2259	1554.2	1157.1		0.286401	0.182879	0.144221	0.0735149		0.0147692
6705	721.8	610.8	617.3		0.0915114	0.0718712	0.07694	0.0101961		0.014557
6706	625.1	416.4	781.2		0.0792516	0.0489967	0.0973685	0.0244384		0.0140493
6803	522.5	211.4	204.6		0.0662437	0.0248749	0.0255013	0.0237056		0.0140206
7001	7308.6	7343.6	6514.8		0.926601	0.864102	0.812002	0.0573778		0.0138598
7003	1026	909.8	892		0.130079	0.107054	0.111179	0.0122771		0.0135859
7101	13451.4	8057.1	3373.4		1.7054	0.948057	0.420459	0.645884		0.0133747
7102	2313.6	1827.1	2810.1		0.293323	0.21499	0.35025	0.0679117		0.0133341
7104	2358.4	5124.9	5513.6		0.299003	0.603033	0.687213	0.204217		0.0133288
7105	96.3	172.1			0.0122091	0.0202505	0	0.0101965		0.0132469
7106	1710.9	1750.9	120.7		0.216912	0.206024	0.015044	0.113536		0.0130706
7107	1609.1	1394.4	1118.8		0.204005	0.164075	0.139447	0.0325801		0.012964
7202	2277.1	3271.6	5768		0.288696	0.38496	0.718921	0.225791		0.0125659
7203	545.6	717.6	470.6		0.0691724	0.0844381	0.0586554	0.012964		0.012482
7205	3077.5	1944.3	2621		0.390172	0.228781	0.32668	0.0813049		0.0124304
7207	691	1114.5	299.1		0.0876065	0.13114	0.0372797	0.0469712		0.0123858
7209	251.7	245.8			0.0319111	0.0289226	0	0.0176246		0.0123834
7401	750.7	708.8	562.1		0.0951754	0.0834026	0.0700599	0.0125659		0.0123568
7403	12579.7	5943.7	7471.1		1.59488	0.699379	0.931195	0.464784		0.0122771
7408	1687.5	1177.7	2208.9		0.213945	0.138577	0.275316	0.0684891		0.0121193
7414	5956.1	3030.7	5398.9		0.755128	0.356614	0.672917	0.210404		0.0118358
7418	116.1	425	1077.2		0.0147194	0.0500086	0.134262	0.0614197		0.0114613
7502		371.3	312.5		0	0.0436899	0.0389499	0.0239735		0.0111691
7507	312.7	199			0.0396448	0.0234158	0	0.0199307		0.0110781
7510	207.7	387.9	16.2		0.0263327	0.0456432	0.00201916	0.0218598		0.0108266
7511	116.5	95.2	138.8		0.0147701	0.0112019	0.0173	0.00306372		0.0104359
7603	2888.4	2183.1	2470		0.366198	0.25688	0.30786	0.0547004		0.0102112
7609	1207.2	918.5			0.153052	0.108077	0	0.078664		0.0101965
7617	2652.1	2197.1	1271.3		0.336239	0.258527	0.158454	0.0891265		0.0101961
7618					0	0	0	0		0.0101711
7619	737.5	1188.1	78.2		0.0935019	0.139801	0.00974682	0.0659197		0.0101233
7706	246.2	314.2			0.0312138	0.0369711	0	0.0198927		0.00992515
8009	646.5	501.2			0.0819647	0.0589749	0	0.0422784		0.00927394
8010	19490.3	18186	18039.4		2.47102	2.1399	2.24842	0.168806		0.00918112
8101	879.4	572.8	271.8		0.111492	0.0673998	0.033877	0.0389274		0.009097
8102	4999.7	6051.9	7197.9		0.633873	0.712111	0.897144	0.135197		0.00874485
8103	711.9	5545.8	3821.8		0.0902563	0.652559	0.476348	0.287606		0.00859858
8108	1230.4	1442.8	1047.1		0.155993	0.16977	0.13051	0.0199188		0.00851968
8109	3307.8	3485.2	2394.3		0.41937	0.410094	0.298425	0.0673102		0.00793269
8201	482.2	101.1	172.8		0.0611344	0.0118962	0.0215377	0.0260936		0.00789948
8207	803.9		137.2		0.10192	0	0.0171006	0.054581		0.00788048
8209	1836.1	2290.7	1254.8		0.232785	0.269541	0.156398	0.0577166		0.00782484
8306	648.8	1328.9	1370.9		0.0822563	0.156368	0.170868	0.0475306		0.00780947
8307	697.5	2107.4	1381.7		0.0884306	0.247972	0.172215	0.0798044		0.00741915
8308		726.8			0	0.0855206	0	0.0493753		0.00714679
8401	26258.6	23717.1	15169		3.32912	2.79073	1.89066	0.726771		0.00597464
8402	5036.6				0.638551	0	0	0.368668		0.00588792
8413	133.5	223.5			0.0169254	0.0262986	0	0.0133288		0.00550612
8415	1119	1944.7	4.2		0.141869	0.228828	0.000523486	0.115227		0.00539604
8509	125.2	349.8			0.0158731	0.04116	0	0.0207587		0.00537272
8512	321.4	320.5			0.0407478	0.0377124	0	0.0227003		0.00516337
8608	132.7	236.6			0.016824	0.0278401	0	0.0140206		0.00510194
8804					0	0	0	0		0.00448581
9002	958.1	592.5			0.12147	0.0697179	0	0.0609561		0.00366701
9101	5391.5	6396.1	1000.2		0.683546	0.752612	0.124665	0.344344		0.00306372
9107	1334.8	1002.4	83.1		0.169229	0.11795	0.0103576	0.081082		0.00155175
9401	10001.2	10147.3	6410.8		1.26797	1.19401	0.79904	0.252114		0.00138042
9402	443.1	4225.5	577.1		0.0561772	0.497203	0.0719295	0.250203		0.000686923
9406	2177.1	30251.8	1721.1		0.276018	3.55965	0.214517	1.91381		0
9409	740.4	2116.5	200.9		0.0938696	0.249043	0.0250401	0.114741		0
9503	5504.8	9149.3	6977.6		0.697911	1.07657	0.869685	0.189602		0
9504	2172.4	12966.4	3211.4		0.275422	1.52572	0.400268	0.688656		0
	788754	849854	802313
